# Supplementary material for: An Integrative Pharmacogenomic Approach Identifies Two-drug Combination Therapies for Personalized Cancer Medicine
Source: PubMed Central journal article supplement (PMC4768263; doi:10.1038/srep22120), 2016-02-26
Supplement: srep22120-s1.pdf [file srep22120-s1.pdf]

# **An Integrative Pharmacogenomic Approach Identifies Two-drug Combination Therapies for Personalized Cancer Medicine**

**Yin Liu<sup>1,2,3</sup>, Teng Fei<sup>4,5</sup>, Xiaoqi Zheng<sup>6</sup>, Myles Brown<sup>4,5</sup>, Peng Zhang<sup>7\*</sup>, X. Shirley Liu<sup>3,5\*</sup>, and Haiyun Wang<sup>1,3\*</sup>**

Supplementary figure 1. Combined effects of genomic alterations contributing to drug sensitivity for the MEK inhibitor PD-0325901.

Supplementary figure 2. Upregulation of PPP1R13L, IL15RA, PIM1, or EGFR expression was associated with decreased drug sensitivity for the MEK inhibitors AZD6244 and PD-0325901 in BRAF mutant cell lines.

Supplementary figure 3. Viability of NCI-H2087 and NCI-H1395 lung adenocarcinoma (LUAD) cell lines is inhibited significantly with increasing drug dosage.

Supplementary figure 4. The detected drug pairs perform on the manually selected pairs of one genomic alteration and one gene expression abnormality. (A) Cells with BRAF mutations were statistically more sensitive to BRAF inhibitor SB590885 than cells with manual selected genomic alteration at 52 of the most frequently mutated cancer genes except BRAF. (B) In BRAF mutant cell lines, the Pearson correlation coefficient values for comparisons between gene expression of 1240 genes functioning in the cancer core pathways and drug sensitivity for the BRAF inhibitor SB590885 were around 0. The Pearson correlation values of four potential genes, PPP1R13L, IL15RA, PIM1, and EGFR, were above the 95% quartile of the distribution for 1240 genes.

Supplementary figure 1

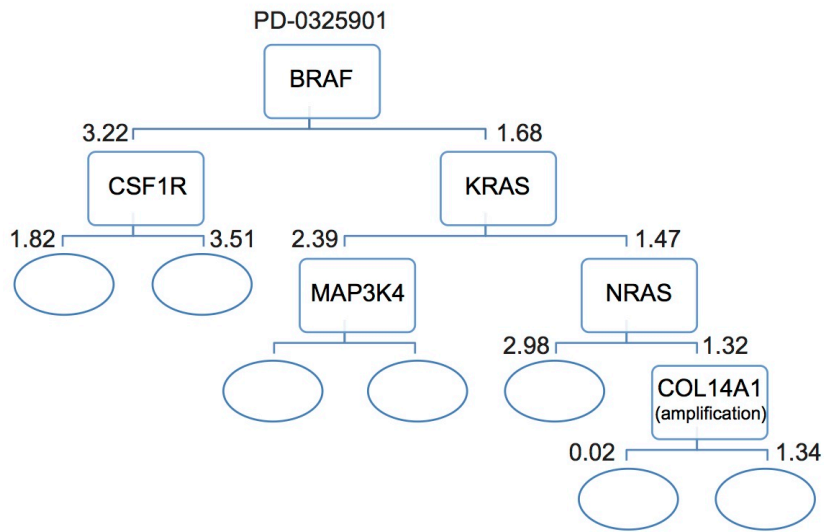

Supplementary figure 2

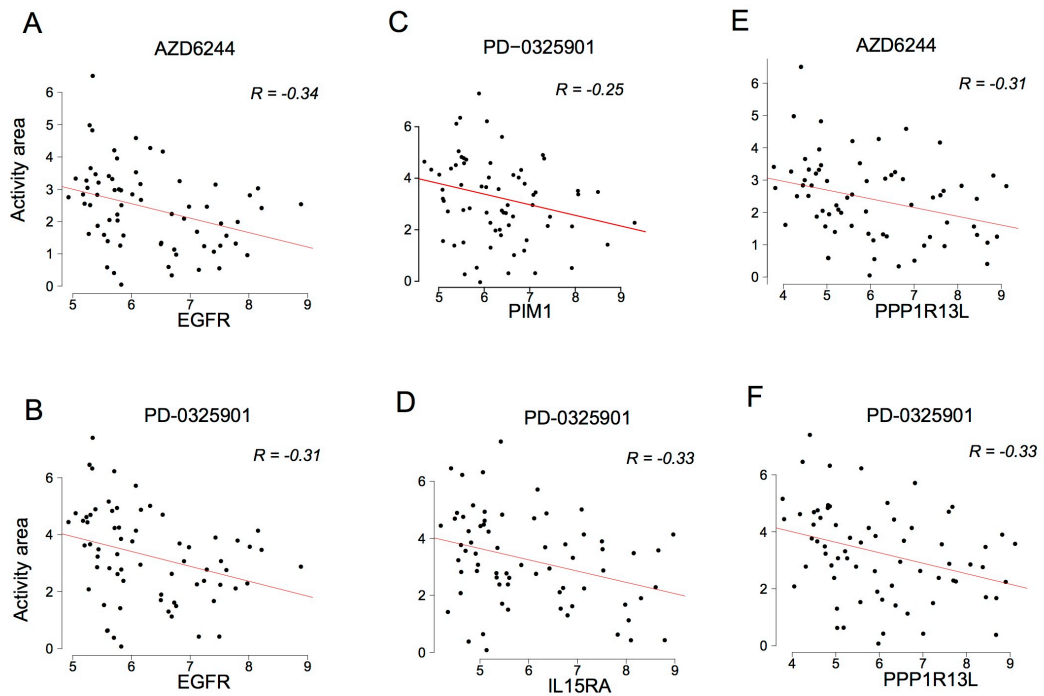

Supplementary figure 3

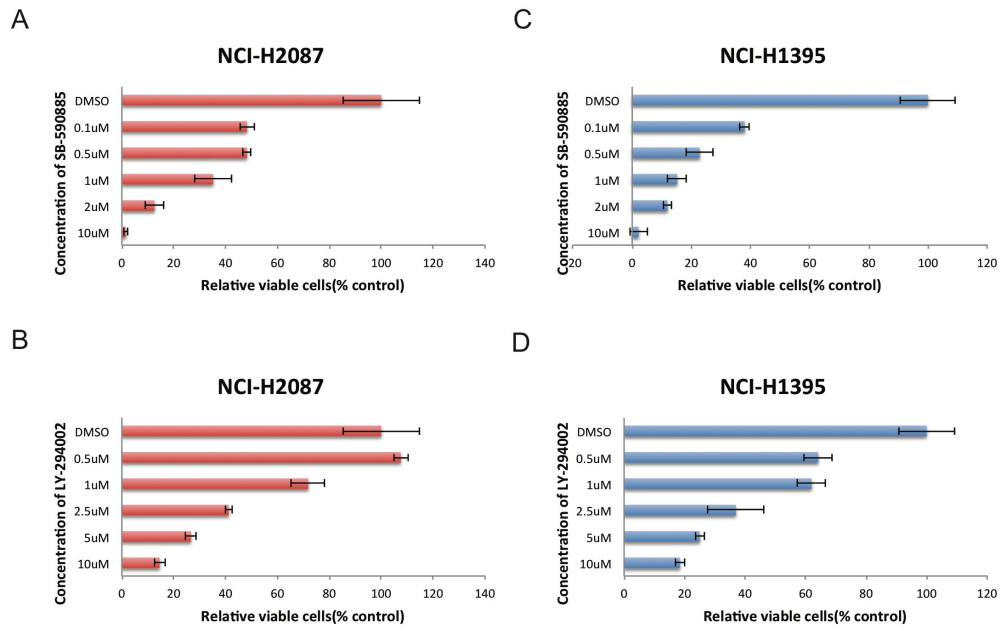

Supplementary figure 4

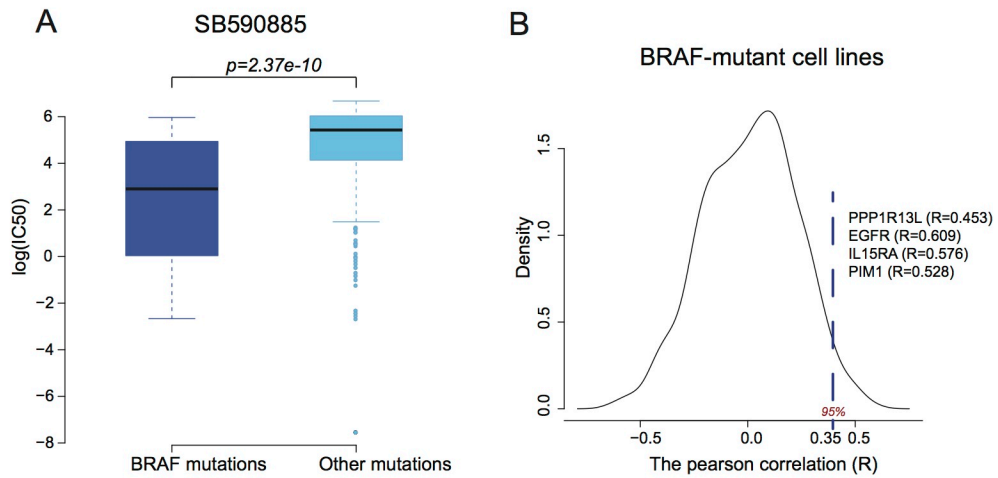

Supplementary table 1. Genes mapped in core cancer pathways annotated by KEGG (Kyoto Encyclopedia of Genes and Genomes), MIPS (The Munich Information Center for Protein Sequences), BIOCARTA, PID (Pathway Interaction Database), and REACTOME databases.

|                                 |                                                                                                                                                                                                                                                                                                                                                                                                                                                                                                                                                                                                                                                                                                                                                                                                                                                                                                                                                           |
|---------------------------------|-----------------------------------------------------------------------------------------------------------------------------------------------------------------------------------------------------------------------------------------------------------------------------------------------------------------------------------------------------------------------------------------------------------------------------------------------------------------------------------------------------------------------------------------------------------------------------------------------------------------------------------------------------------------------------------------------------------------------------------------------------------------------------------------------------------------------------------------------------------------------------------------------------------------------------------------------------------|
| BIOCARTA TGFB PATHWAY           | EP300,MAP2K1,APC,MAP3K7,ZFYVE9,TGFB2,TGFB1,CREBBP,MAPK3,TAB1,SMAD3,SMAD4,TGFB2,SKIL,TGFB1,SMAD7,TGFB3,CDH1,SMAD2                                                                                                                                                                                                                                                                                                                                                                                                                                                                                                                                                                                                                                                                                                                                                                                                                                          |
| KEGG TGF BETA SIGNALING PATHWAY | TFDP1,NOG,TNF,GDF7,INHBB,INHBC,COMP,INHBA,THBS4,RHOA,CREBBP,ROCK1,ID1,ID2,RPS6KB1,RPS6KB2,CUL1,LOC728622,ID4,SMAD3,MAPK3,RBL2,SMAD4,RBL1,NODAL,SMAD1,MYC,SMAD2,MAPK1,SMURF2,SMURF1,EP300,BMP8A,GDF5,SKP1,CHRD,TGFB2,TGFB1,JFNG,CDKN2B,PPP2CB,PPP2CA,PPP2R1A,ID3,SMAD5,RBX1,FST,PI TX2,PPP2R1B,TGFB2,AMHR2,LTPB1,LEFTY1,AMH,TGFB1,SMAD9,LEFTY2,SMAD7,ROCK2,TGFB3,SMAD6,BMP2,GDF6,BMPRI1A,BMPRI1B,ACVRL1,ACVR2B,ACVR2A,ACVR1,BMP4,E2F5,BMP2,ACVR1C,E2F4,SP1,BMP7,BMP8B,ZFYVE9,BMP5,BMP6,ZFYVE16,THBS3,INHBE,THBS2,DCN,THBS1,                                                                                                                                                                                                                                                                                                                                                                                                                                |
| KEGG WNT SIGNALING PATHWAY      | JUN,LRP5,LRP6,PPP3R2,SFRP2,SFRP1,PPP3CC,VANGL1,PPP3R1,FZD1,FZD4,APC2,FZD6,FZD7,SENP2,FZD8,LEF1,CREBBP,FZD9,PRICKLE1,CTBP2,ROCK1,CTBP1,WNT9B,WNT9A,CTNNBIP1,DAAM2,TBL1XR1,MMP7,CER1,MAP3K7,VANGL2,WNT2B,WNT11,WNT10B,DKK2,LOC728622,CHP2,AXIN1,AXIN2,DKK4,NFAT5,MYC,SOX17,CSNK2A1,CSNK2A2,NFATC4,CSNK1A1,NFATC3,CSNK1E,BTRC,PRKX,SKP1,FBXW11,RBX1,CSNK2B,SHH,TBL1Y,WNT5B,CCND1,CAMK2A,NLK,CAMK2B,CAMK2D,CAMK2G,PRKACA,APC,PRKACB,PRKACG,WNT16,DAAM1,CHD8,FRAT1,CACYBP,CCND2,NFATC2,NFATC1,CCND3,PLCB2,PLCB1,CSNK1A1L,PRKCB,PLCB3,PRKCA,PLCB4,WIF1,PRICKLE2,PORCN,RHOA,FRAT2,PRKCG,MAPK9,MAPK10,WNT3A,DVL3,RAC2,DVL2,RAC3,FZD3,DKK1,CXXC4,DVL1,FOSL1,CUL1,WNT10A,WNT4,SMAD3,TCF7,SMAD4,RAC1,TCF7L2,SMAD2,WNT1,MAPK8,E300,WNT7A,GSK3B,WNT7B,PSEN1,WNT8A,WNT8B,WNT2,WNT3,WNT5A,WNT6,CTNNB1,PPP2CB,PPP2CA,PPP2R1A,TBL1X,PPP2R1B,ROCK2,NKD1,FZD10,FZD5,NKD2,TCF7L1,RUVBL1,PPARD,PPP3CB,TP53,PPP3CA,PPP2R5A,PPP2R5E,PPP2R5D,PPP2R5C,PPP2R5B,FZD2,SFRP5,SFRP4,CHP |
| BIOCARTA WNT PATHWAY            | CSNK2A1,WNT1,CSNK1D,CSNK1A1,GSK3B,BTRC,WIF1,CTNNB1,FZD1,PPP2CA,CREBBP,LEF1,TLE1,CCND1,CTBP1,NLK,APC,MAP3K7,DVL1,PPARD,FRAT1,AXIN1,HDAC1,TAB1,SMAD4,MYC,                                                                                                                                                                                                                                                                                                                                                                                                                                                                                                                                                                                                                                                                                                                                                                                                   |
| KEGG HEDGEHOG SIGNALING PATHWAY | CSNK1A1L,HHIP,PTCH2,GAS1,WNT3A,ZIC2,WNT9B,WNT9A,LRP2,CSNK1G1,WNT2B,WNT11,WNT10B,IHH,SMO,WNT10A,WNT4,CSNK1G3,SHH,WNT1,CSNK1D,RAB23,CSNK1A1,CSNK1G2,CSNK1E,BMP8A,GSK3B,WNT7A,BTRC,WNT7B,WNT8A,WNT8B,WNT2,WNT3,PRKX,WNT5A,WNT6,FBXW11,STK36,WNT5B,GLI1,DHH,PRKACA,PRKACB,SUFU,BMP4,PRKACG,BMP2,GLI2,BMP7,GLI3,PTCH1,BMP8B,WNT16,BMP5,BMP6,                                                                                                                                                                                                                                                                                                                                                                                                                                                                                                                                                                                                                   |
| PID HIF1A PATHWAY               | HIF1A,OS9,VHL,HSP90AA1,HIF1AN,TCEB1,NAA10,TCEB2,COPS5,TP53,RBX1,ARNT,EGLN3,EGLN1,CUL2,CDKN2A,GNB2L1,HIF3A,EGLN2                                                                                                                                                                                                                                                                                                                                                                                                                                                                                                                                                                                                                                                                                                                                                                                                                                           |
| PID TGFB PATHWAY                | EIF2A,PARDA6,NEDD4L,CTNNB1,OCLN,SPTBN1,RPS6KB1,TAB2,TGFB3,CAV1,TGFB1,GRB2,RNF111,PPP2CA,PPP2CB,SMURF1,SMAD7,DAXX,WWP1,TGFB2,DAB2,PDPK1,SOS1,AXIN1,ITCH,RHOA,PPP2R2A,TGFB1,SMURF2,YWHAE,ZFYVE16,PML,SMAD2,PPP1CA,DACT2,CTGF,STRAP,PPP1R15A,FKBP1A,ARRB2,SMAD4,CAMK2A,SMAD3,DYNLRB1,SKIL,SHC1,MAP3K7,TAB1,XIAP,BAMBI,TGFBRAPI,ZFYVE9,YAP1,TGFB2,TGFB3                                                                                                                                                                                                                                                                                                                                                                                                                                                                                                                                                                                                       |
| PID WNT SIGNALING PATHWAY       | DKK1,WNT3A,FZD9,WNT2,WNT7A,IGFBP4,WNT1,FZD8,FZD1,KREMEN2,LRP6,KREMEN1,FZD2,LRP5,FZD6,RSP01,WNT7B,FZD4,CTHRC1,WNT5A,RYK,FZD5,ATP6AP2,WNT3,ROR2,WIF1,FZD10,FZD7                                                                                                                                                                                                                                                                                                                                                                                                                                                                                                                                                                                                                                                                                                                                                                                             |
| PID WNT CANONICAL PATHWAY       | LRP6,GSK3A,AXIN1,CUL3,WNT3A,DVL3,GSK3B,FZD5,PPP2R5A,CSNK1G1,DVL1,PI4K2A,CTNNB1,DVL2,APC,NKD2,PIP5K1B,RANBP3,KLHL12,CAV1,                                                                                                                                                                                                                                                                                                                                                                                                                                                                                                                                                                                                                                                                                                                                                                                                                                  |
| PID WNT NONCANONICAL PATHWAY    | YES1,PRKCK,MAP3K7,TAB2,FLNA,CSNK1A1,CDC42,DAAM1,FZD7,WNT5A,ROR2,NFATC2,SETDB1,NLK,ROCK1,RAC1,ARRB2,FZD5,MAPK8,CHD7,MAPK9,PPARG,CAMK2A,DVL1,RHOA,FZD6,CTHRC1,DVL2,DVL3,FZD2,TAB1,MAPK10,                                                                                                                                                                                                                                                                                                                                                                                                                                                                                                                                                                                                                                                                                                                                                                   |
| PID HEDGEHOG GLIPATHWAY         | SUFU,HDAC2,SSPO,PIAS1,GLI2,HDAC1,GNB1,SMO,RAB23,RBBP7,GLI3,CSNK1G3,KIF3A,CREBBP,GLI1,STK36,NG2,GSK3B,FBXW11,GNAI3,SHH,CSNK1G2,XPO1,CSNK1E,IFT88,CSNK1D,MAP2K1,MTSS1,PRKCD,CSNK1A1,AKT1,GNAAZ,IFT172,GNAI1,PTCH1,LGALS3,GNAA1,CSNK1G1,FOXA2,SIN3B,RBBP4,SIN3A,SPOP,ARRB2,GNAI2,SAP30,SAP18,PRKACA                                                                                                                                                                                                                                                                                                                                                                                                                                                                                                                                                                                                                                                          |

|                                                                                  |                                                                                                                                                                                                                                                                                                                                                                                                                                                                                                                                                                                                                                                                                                                                                                                                                                                                                                                                |
|----------------------------------------------------------------------------------|--------------------------------------------------------------------------------------------------------------------------------------------------------------------------------------------------------------------------------------------------------------------------------------------------------------------------------------------------------------------------------------------------------------------------------------------------------------------------------------------------------------------------------------------------------------------------------------------------------------------------------------------------------------------------------------------------------------------------------------------------------------------------------------------------------------------------------------------------------------------------------------------------------------------------------|
| KEGG JAK STAT SIGNALING PATHWAY                                                  | STAT3,STAT4,STAT1,STAT2,PIAS3,TYK2,IL21R,CREBBP,SOCS5,IL23A,CTF1,STAM,SPRY4,IL22,JAK1,AKT1,AKT2,JAK3,JAK2,AKT3,STAT5B,STAT5A,TPO,STAT6,MYC,IL24,SPRED1,PIK3R5,CSF2,IL13RA2,PIAS1,IL13RA1,CNTF,PRLR,CNTFR,PRL,SOCS1,IFNE,CSF2RB,CSF2RA,IL23R,CSF3,SOCS3,CCND1,IL22RA2,CSH1,BCL2L1,CSF3R,PIAS4,CBL,C,CLCF1,OSMR,IL20,CCND2,CCND3,SOS2,EPO,PTPN11,IL9R,MPL,SPRED2,IFNA5,IFNA4,IFNA2,IL28RA,SOCS2,IFNA1,CISH,PTPN6,IL9,IL7R,IL12RB1,IL12B,IL13,IL12RB2,IL11RA,IL12A,IRF9,IFNA17,PIAS2,IFNA21,IFNA6,LEPR,IFNA7,IFNA8,IFNA10,IFNA13,GRB2,IFNA14,LEP,IFNA16,IL26,IL19,IL10,IL10RA,SOS1,IL10RB,EPOR,IL11,IL3RA,IL3,EP300,IL2RG,IL2RB,CBLB,OSM,CBL,IL15RA,IFNGR2,IL15,IFNG,IFNGR1,IFNB1,IFNAR1,IFNAR2,IL21,IL20RB,IL2RA,IL22RA1,IL20RA,IL2,IL6R,PIK3R3,CRLF2,IFNK,SPRY2,IL6ST,SPRY1,IL7,STAM2,GHR,IL28B,IL29,SOCS4,PIK3CA,PIK3CB,PIM1,IL28A,PIK3CD,LIF,GH1,GH2,IFNW1,LIFR,TSLP,IL4,IL4R,SPRY3,IL5,PIK3CG,SOCS7,IL5RA,PIK3R1,IL6,PIK3R2, |
| PID NOTCH PATHWAY                                                                | NCOR1,NOTCH1,DTX1,FURIN,SSPO,DLL1,DNM1,PTCRA,RAB11A,NEURL,CTBP1,FBXW7,NUMB,CBL,MFAP2,MYCBP,DLL4,MAML1,SPEIN,MYC,SKP2,CNTN6,NOTCH2,PSEN1,MAML2,YY1,GATA3,ENO1,ITCH,IL4,APH1B,LNX1,NCOR2,RBPJ,CDKN1A,JAG2,ADAM12,DLK1,EPS15,DNER,SKP1,NOTCH3,RBBP8,NOTCH4,JAG1,APH1A,DLL3,PSENEN,MFAP5,NCSTN,CCND1,EP300,HDAC1,MARK2,MIB1,ADAM10,CUL1,CNTN1,KDM1A,                                                                                                                                                                                                                                                                                                                                                                                                                                                                                                                                                                               |
| KEGG NOTCH SIGNALING PATHWAY                                                     | HES5,DTX3,NOTCH4,DTX3L,NOTCH3,NOTCH2,EP300,HES1,NOTCH1,NUMB,PSEN2,PSEN1,PTCRA,SNW1,APH1A,KAT2A,ADAM17,RFNG,RBPJ,DTX1,CREBBP,DTX2,MAML1,CTBP2,NCOR2,CTBP1,DVL3,JAG2,DVL2,NUMBL,MAML2,KAT2B,DLL4,PSENEN,DLL3,DVL1,CIR1,DLL1,LFNG,JAG1,MAML3,HDAC1,HDAC2,NCSTN,DTX4,MFNG,RBPJL,                                                                                                                                                                                                                                                                                                                                                                                                                                                                                                                                                                                                                                                   |
| REACTOME G1 S TRANSITION                                                         | CDK2,PSMD14,CDK7,CDKN1A,CDKN1B,DBF4,CKS1B,DHFR,E2F1,ORC6,ORC3,POLA2,FBXO5,PPP2R3B,RPA4,MAX,MCM2,MCM3,MCM4,MCM5,MCM6,MCM7,MNAT1,LOC441488,MYC,ORC1,ORC2,ORC4,ORC5,PCNA,POLA1,POLE,POLE2,PPP2CA,PPP2CB,PPP2R1A,PPP2R1B,MCM10,PRIM1,PRIM2,PSMA1,PSMA2,PSMA3,PSMA4,PSMA5,PSMA6,PSMA7,PSMB1,PSMB2,PSMB3,PSMB4,PSMB5,PSMB6,PSMB7,PSMB8,PSMB9,PSMB10,PSMC1,PSMC2,PSMC3,PSMC4,PSMC5,PSMC6,PSMD1,PSMD2,PSMD3,PSMD4,PSMD5,PSMD7,PSMD8,PSMD9,PSMD10,PSMD11,PSMD12,PSMD13,PSME1,PSME2,RB1,RPA1,RPA2,RPA3,RPS27A,RRM2,DHFRP1,LOC645084,SKP1,SKP2,LOC652826,TFDP1,TK2,RPS27AP11,TYMS,LOC729964,UBA52,WEE1,CDT1,CDC7,CDC45,MCM8,CUL1,CCNA2,CCNA1,CCNB1,CCNE1,CCNH,PKMYT1,CCNE2,PSMF1,CDK1,PSMD6,CDC6,CDC25A                                                                                                                                                                                                                                   |
| REACTOME SIGNALING BY NOTCH                                                      | HDAC6,HDAC5,MAMLD1,ADAM10,CDK8,ST3GAL6,TMED2,DTX2,CNTN1,CREBBP,MIB2,JAG1,DTX1,E2F1,E2F3,EIF2C3,EIF2C4,EP300,SNW1,TNRC6B,DTX4,NCSTN,HEY1,HEY2,POFUT1,KAT2A,HEYL,EIF2C1,B4GALT1,EIF2C2,TNRC6A,DLL1,HDAC1,HDAC2,HIF1A,HES1,RBPJ,JAG2,JUN,HES5,LFNG,ARRB1,ARRB2,MFNG,MOV10,LOC441488,MYC,NOTCH2,NOTCH3,NOTCH4,ATP2A1,ATP2A2,ATP2A3,FURIN,APH1A,HDAC7,DLL4,FBXW7,MAML3,PSENEN,HDAC8,PSEN1,PSEN2,POGLUT1,MIB1,TNRC6C,RAB6A,CCND1,RFNG,RPS27A,SEL1L,ST3GAL3,SKP1,ADAM17,TBL1X,TFDP1,TLE1,TLE2,TLE3,TLE4,TP53,LOC728030,RPS27AP11,UBA52,TBL1XR1,HDAC11,APH1B,HDAC10,MAML2,CUL1,NUMB,DLK1,HDAC3,KAT2B,CCNC,NEURL,DNER,NCOR1,NCOR2,HDAC9,HDAC4,MAML1,RBX1                                                                                                                                                                                                                                                                                |
| REACTOME SIGNALING BY WNT                                                        | FRAT1,PSMD14,FAM123B,PSMA8,CSNK1A1,CTNNB1,PSME4,FRAT2,APC,PPP2CA,PPP2CB,PPP2R1A,PPP2R1B,PPP2R5A,PPP2R5B,PPP2R5C,PPP2R5D,PPP2R5E,PSMA1,PSMA2,PSMA3,PSMA4,PSMA5,PSMA6,PSMA7,PSMB1,PSMB2,PSMB3,PSMB4,PSMB5,PSMB6,PSMB7,PSMB8,PSMB9,PSMB10,PSMC1,PSMC2,PSMC3,PSMC4,PSMC5,PSMC6,PSMD1,PSMD2,PSMD3,PSMD4,PSMD5,PSMD7,PSMD8,PSMD9,PSMD10,PSMD11,PSMD12,PSMD13,PSME1,PSME2,RPS27A,SKP1,LOC652826,RPS27AP11,UBA52,AXIN1,CUL1,BTRC,PSMF1,PSMD6,                                                                                                                                                                                                                                                                                                                                                                                                                                                                                          |
| REACTOME DOWNREGULATION OF TGF BETA RECEPTOR SIGNALING                           | STUB1,STRAP,PPP1R15A,SMAD2,SMAD3,SMAD7,UCHL5,PPP1CA,PPP1CB,PPP1CC,PMEP1,SMURF1,RPS27A,SMURF2,TGFB1,TGFB1,TGFB2,RPS27AP11,UBA52,LOC731429,XPO1,MTMR4,ZFYVE9,                                                                                                                                                                                                                                                                                                                                                                                                                                                                                                                                                                                                                                                                                                                                                                    |
| REACTOME TGF BETA RECEPTOR SIGNALING IN EMT EPITHELIAL TO MESENCHYMAL TRANSITION | FKBP1A,ARHGEF18,RHOA,F11R,PARD6A,PRKCZ,PARD3,SMURF1,CNGN,RPS27A,TGFB1,TGFB1,TGFB2,RPS27AP11,UBA52,LOC731429                                                                                                                                                                                                                                                                                                                                                                                                                                                                                                                                                                                                                                                                                                                                                                                                                    |
| REACTOME TGF BETA RECEPTOR SIGNALING ACTIVATES SMADS                             | STUB1,STRAP,FKBP1A,PPP1R15A,SMAD2,SMAD3,SMAD4,SMAD7,FURIN,UCHL5,PPP1CA,PPP1CB,PPP1CC,PMEP1,SMURF1,RPS27A,SMURF2,TGFB1,TGFB1,TGFB2,RPS27AP11,UBA52,LOC731429,XPO1,MTMR4,ZFYVE9,                                                                                                                                                                                                                                                                                                                                                                                                                                                                                                                                                                                                                                                                                                                                                 |

|                                                                          |                                                                                                                                                                                                                                                                                                                                                                                                                                                                                                                                                                                                                                                                                                                                                                                                                                                                                                                                                       |
|--------------------------------------------------------------------------|-------------------------------------------------------------------------------------------------------------------------------------------------------------------------------------------------------------------------------------------------------------------------------------------------------------------------------------------------------------------------------------------------------------------------------------------------------------------------------------------------------------------------------------------------------------------------------------------------------------------------------------------------------------------------------------------------------------------------------------------------------------------------------------------------------------------------------------------------------------------------------------------------------------------------------------------------------|
| REACTOME SIGNALING BY TGF BETA RECEPTOR COMPLEX                          | CDK8,CDK9,STUB1,CDKN2B,STRAP,PARP1,E2F4,E2F5,FKBP1A,ARH GEF18,PPP1R15A,WWTR1,HDAC1,JUNB,RHOA,SMAD2,SMAD3,SMA D4,SMAD7,MEN1,LOC441488,MYC,FURIN,SERPINE1,F11R,PARD6A, UCHL5,TRIM33,PPM1A,PPP1CA,PPP1CB,PPP1CC,PRKCKZ,PARD3,PM EPA1,SMURF1,CGN,RBL1,TGIF2,RPS27A,SMURF2,SKI,SKIL,SP1,TFD P1,TGFB1,TGFBR1,TGFBR2,TGIF1,RPS27AP11,UBA52,LOC731429,U BE2D1,UBE2D3,XPO1,USP9X,CCNC,CCNT1,CCNT2,MTMR4,ZFYVVE9 ,NCOR1,NCOR2                                                                                                                                                                                                                                                                                                                                                                                                                                                                                                                                   |
| REACTOME P53 INDEPENDENT G1 S DNA DAMAGE CHECKPOINT                      | PSMD14,CHEK1,CHEK2,PSMA8,PSME4,ATM,PSMA1,PSMA2,PSMA3, PSMA4,PSMA5,PSMA6,PSMA7,PSMB1,PSMB2,PSMB3,PSMB4,PSMB 5,PSMB6,PSMB7,PSMB8,PSMB9,PSMB10,PSMC1,PSMC2,PSMC3,PSM C4,PSMC5,PSMC6,PSMD1,PSMD2,PSMD3,PSMD4,PSMD5,PSMD7,PS MD8,PSMD9,PSMD10,PSMD11,PSMD12,PSMD13,PSME1,PSME2,RPS2 7A,LOC651610,LOC652826,RPS27AP11,UBA52,PSMF1,PSMD6,CDC25 A                                                                                                                                                                                                                                                                                                                                                                                                                                                                                                                                                                                                             |
| REACTOME P53 DEPENDENT G1 DNA DAMAGE RESPONSE                            | CDK2,PSMD14,CDKN1A,CDKN1B,PSMA8,PSME4,MDM2,ATM,PSMA 1,PSMA2,PSMA3,PSMA4,PSMA5,PSMA6,PSMA7,PSMB1,PSMB2,PSM B3,PSMB4,PSMB5,PSMB6,PSMB7,PSMB8,PSMB9,PSMB10,PSMC1,PS MC2,PSMC3,PSMC4,PSMC5,PSMC6,PSMD1,PSMD2,PSMD3,PSMD4,P SMD5,PSMD7,PSMD8,PSMD9,PSMD10,PSMD11,PSMD12,PSMD13,PS ME1,PSME2,RPS27A,RFWD2,LOC651610,LOC652826,TP53,RPS27AP1 1,RFWD2P1,UBA52,CCNE1,CCNE2,PSMF1,PSMD6                                                                                                                                                                                                                                                                                                                                                                                                                                                                                                                                                                         |
| REACTOME INHIBITION OF REPLICATION INITIATION OF DAMAGED DNA BY RB1 E2F1 | E2F1,POLA2,PPP2R3B,LOC441488,POLA1,PPP2CA,PPP2CB,PPP2R1A, PPP2R1B,PRIM1,PRIM2,RB1,TFDP1                                                                                                                                                                                                                                                                                                                                                                                                                                                                                                                                                                                                                                                                                                                                                                                                                                                               |
| REACTOME G2 M DNA DAMAGE CHECKPOINT                                      | CHEK1,CHEK2,ATM,ATR,LOC648152,LOC651610,LOC651921,WEE1,A TRIP,CCNB1,CDK1,CDC25C                                                                                                                                                                                                                                                                                                                                                                                                                                                                                                                                                                                                                                                                                                                                                                                                                                                                       |
| REACTOME DNA REPAIR                                                      | RAD50,CDK7,CCNO,MAD2L2,POLD3,ERCC8,ALKBH2,DDB1,DDB2,E RCC1,ERCC2,ERCC3,ERCC4,ERCC5,ERCC6,FANCA,FANCC,FANCD2, FANCE,FANCB,FANCF,FANCG,ALKBH3,FEN1,SMUG1,XRCC6,ZBTB 32,UBE2T,GTFF2H1,GTFF2H2,GTFF2H3,GTFF2H4,H2AFX,APEX1,LOC389 901,LIG1,LIG3,LIG4,MGMT,MNAT1,MPG,MRE11A,MUTYH,NBN,AT M,NTHL1,OGG1,PCNA,REV1,POLB,POLD1,POLD2,POLE,POLE2,POL H,POLR2A,POLR2B,POLR2C,POLR2D,POLR2E,POLR2F,POLR2G,POL R2H,POLR2I,POLR2J,POLR2K,POLR2L,ATR,FANCL,TDP1,PRKDC,XA B2,FANCM,POLD4,RAD23B,RAD51,RAD52,REV3L,RFC2,RFC3,RFC4, RFC5,RPA1,RPA2,RPA3,RPS27A,LOC648152,LOC651610,LOC651921,L OC652672,LOC652857,GTFF2H2B,BRCA1,BRCA2,TCEA1,TDG,TP53BP 1,RPS27AP11,UBA52,USP1,XPA,XPC,XRCC1,XRCC4,XRCC5,PALB2,C 17orf70,BRIP1,MBD4,CCNH,C19orf40,MDC1                                                                                                                                                                                                                  |
| REACTOME REGULATION OF APOPTOSIS                                         | PSMD14,PSMA8,DAPK1,DAPK3,DCC,UNC5B,PSME4,DAPK2,APPL1,P AK2,PSMA1,PSMA2,PSMA3,PSMA4,PSMA5,PSMA6,PSMA7,PSMB1,P SMB2,PSMB3,PSMB4,PSMB5,PSMB6,PSMB7,PSMB8,PSMB9,PSMB10, PSMC1,PSMC2,PSMC3,PSMC4,PSMC5,PSMC6,PSMD1,PSMD2,PSMD3 ,PSMD4,PSMD5,PSMD7,PSMD8,PSMD9,PSMD10,PSMD11,PSMD12,PS MD13,PSME1,PSME2,RPS27A,LOC652826,RPS27AP11,UBA52,ARHG AP10,CASP3,CASP9,UNC5A,PSMF1,MAGED1,PSMD6                                                                                                                                                                                                                                                                                                                                                                                                                                                                                                                                                                     |
| REACTOME APOPTOSIS                                                       | BCL2L11,DNMI1L,BCAP31,PSMD14,ADD1,DYNLL2,PSMA8,CTNBN1, DAPK1,DAPK3,DCC,DFFA,DFFB,DSG1,DSG2,DSG3,DSP,E2F1,AKT1, UNC5B,ACIN1,PSME4,FNTA,DAPK2,APPL1,GAS2,BBC3,DBNL,GSN, GZMB,H1F0,HIST1H1C,HIST1H1D,HIST1H1E,HIST1H1B,HIST1H1A,H MGB1,HMGB2,APAF1,APC,BIRC2,XIAP,FAS,FASLG,KPNA1,KPNB1,L MNA,LMNB1,MAPT,LOC441488,NMT1,OCLN,PAK2,MST4,PKP1,PLE C,PMAIP1,CYCS,PPP3R1,PRKCD,PRKCC,MAPK8,DIABLO,PSMA1,PS MA2,PSMA3,PSMA4,PSMA5,PSMA6,PSMA7,PSMB1,PSMB2,PSMB3,P SMB4,PSMB5,PSMB6,PSMB7,PSMB8,PSMB9,PSMB10,PSMC1,PSMC2, PSMC3,PSMC4,PSMC5,PSMC6,PSMD1,PSMD2,PSMD3,PSMD4,PSMD 5,PSMD7,PSMD8,PSMD9,PSMD10,PSMD11,PSMD12,PSMD13,BAD,PS ME1,PSME2,PTK2,BAK1,BAX,BCL2,BCL2L1,ROCK1,RPS27A,SATB1, BID,LOC647859,LOC652460,LOC652826,BMX,SPTAN1,TFDP1,TJP1,T NF,TNFRSF1A,TP53,TRAF2,ROCK1P1,RPS27AP11,UBA52,VIM,YWH AB,ARHGAP10,CASP3,CASP6,CASP7,CASP8,CASP9,STK24,CASP10, DYNLL1,TRADD,RIPK1,TNFSF10,FADD,TNFRSF10B,CFLAR,UNC5A, BMF,TJP2,PSMF1,MAGED1,PSMD6,CDH1 |
| REACTOME INTRINSIC PATHWAY FOR APOPTOSIS                                 | BCL2L11,DYNLL2,E2F1,AKT1,BBC3,GZMB,APAF1,XIAP,LOC441488, NMT1,PMAIP1,CYCS,PPP3R1,MAPK8,DIABLO,BAD,BAK1,BAX,BCL 2,BCL2L1,BID,TFDP1,TP53,YWHAB,CASP3,CASP7,CASP8,CASP9,DY NLL1,BMF                                                                                                                                                                                                                                                                                                                                                                                                                                                                                                                                                                                                                                                                                                                                                                      |

|                                                      |                                                                                                                                                                                                                                                                                                                                                                                                                                                                                                                                                                       |
|------------------------------------------------------|-----------------------------------------------------------------------------------------------------------------------------------------------------------------------------------------------------------------------------------------------------------------------------------------------------------------------------------------------------------------------------------------------------------------------------------------------------------------------------------------------------------------------------------------------------------------------|
| KEGG APOPTOSIS                                       | CASP10,CASP9,CASP8,CASP7,CHUK,PRKAR2B,TNF,TNFSF10,BIRC3,XIAP,PPP3R2,PPP3CC,PPP3R1,MYD88,FADD,CFLAR,RIPK1,BAD,IRAK4,BID,BAX,IKBK,ICASP6,IL1A,AKT1,CASP3,AKT2,TNFRSF1A,AKT3,CHP2,ATM,ENDOG,NFKB1,NFKBIA,CAPN2,PIK3R5,IKBK,ICAPN1,IL3RA,IL3,RELA,ENDOD1,APAF1,PRKX,CSF2RB,TNFRSF10A,TRAF2,TNFRSF10D,NGF,TNFRSF10B,TNFRSF10C,MAP3K14,IL1RAP,IL1B,IRAK2,IL1R1,IRAK1,TRADD,PIK3R3,BCL2,BCL2L1,BIRC2,IRAK3,PRKACA,PRKACB,PRKACG,PPP3CB,TP53,PPP3CA,PIK3CA,PIK3CB,FASS,DFFA,CYCS,DFFB,PIK3CD,LOC651610,PRKAR1A,FASLG,PRKAR2A,PRKAR1B,EXO,PIK3CG,AIFM1,NTRK1,PIK3R1,PIK3R2,CHP |
| REACTOME PI3K CASCADE                                | FRS2,THEM4,KLB,DOK1,EIF4B,EIF4E,EIF4EBP1,EIF4G1,AKT2,FGF1,FGF2,FGF3,FGF4,FGF5,FGF6,FGF7,FGF8,FGF9,FGF10,FGFR1,FGFR3,FGFR2,FGFR4,MTOR,GAB1,FGF20,FGF22,GRB2,EEF2K,PIK3R4,INS,INSR,IRS1,PDE3B,PRKAG2,PDPK1,CAB39,PIK3C3,PIK3CA,PIK3CB,PIK3R1,PIK3R2,PRKAG3,TLR9,PPM1A,STRADB,PRKAA1,PRKAA2,PRKAB1,PRKAB2,PRKAG1,RPTOR,TRIB3,RHEB,RPS6,RPS6KB1,MLST8,LOC644462,STK11,TSC1,TSC2,LOC729120,LOC730244,FGF23,CAB39L,IRS2,FGF18,FGF17,STRADA,KL,FGF19,                                                                                                                        |
| REACTOME PI3K EVENTS IN ERBB4 SIGNALING              | AKT3,CDKN1A,CDKN1B,CHUK,THEM4,CREB1,NRG4,HBEGF,ERBB4,EREG,AKT1,AKT2,FOXO1,FOXO3,PHLPP1,MTOR,RICTOR,GSK3A,NRG1,NR4A1,MDM2,FOXO4,PDPK1,PIK3CA,PIK3R1,BAD,PTEN,TRIB3,RPS6KB2,MLST8,BTC,TSC2,LOC729120,LOC731292,MAPKAP1,CASP9,AKT1S1,NRG2,                                                                                                                                                                                                                                                                                                                               |
| REACTOME PI3K EVENTS IN ERBB2 SIGNALING              | AKT3,CDKN1A,CDKN1B,CHUK,THEM4,CREB1,NRG4,HBEGF,EGF,EGFR,ERBB2,ERBB3,ERBB4,EREG,AKT1,AKT2,FOXO1,FOXO3,PHLPP1,MTOR,RICTOR,GAB1,GRB2,GSK3A,NRG1,NR4A1,MDM2,FOXO4,PDPK1,PIK3CA,PIK3R1,BAD,PTEN,TRIB3,RPS6KB2,MLST8,BTC,TSC2,LOC729120,LOC731292,MAPKAP1,CASP9,AKT1S1,NRG2,                                                                                                                                                                                                                                                                                                |
| BIOCARTA PTEN PATHWAY                                | PTK2,PTEN,PDK2,SHC1,FOXO3,PDPK1,BCAR1,CDKN1B,ILK,AKT1,PIK3CA,ITGB1,FASLG,GRB2,MAPK3,PIK3R1,SOS1,MAPK1                                                                                                                                                                                                                                                                                                                                                                                                                                                                 |
| REACTOME NEGATIVE REGULATION OF THE PI3K AKT NETWORK | AKT3,THEM4,AKT1,AKT2,PHLPP1,PTEN,TRIB3,LOC729120,LOC731292                                                                                                                                                                                                                                                                                                                                                                                                                                                                                                            |
| REACTOME PI3K AKT ACTIVATION                         | AKT3,CDKN1A,CDKN1B,CHUK,THEM4,CREB1,AKT1,AKT2,FOXO1,FOXO3,PHLPP1,MTOR,RICTOR,GSK3A,NR4A1,IRS1,RHOA,MDM2,FOXO4,NGF,NTRK1,PDPK1,PIK3CA,PIK3CB,PIK3R1,PIK3R2,BAD,PTEN,TRIB3,RPS6KB2,MLST8,TSC2,LOC729120,LOC731292,MAPKAP1,CASP9,AKT1S1,IRS2,                                                                                                                                                                                                                                                                                                                            |
| REACTOME SIGNALLING TO RAS                           | MAPK14,SHC2,GRB2,HRAS,KRAS,NGF,NRAS,NTRK1,SHC3,MAPK1,MAPK3,MAPK11,MAPK13,MAP2K1,MAP2K2,RAF1,RALA,RALB,RALGDS,MAPK12,SHC1,SOS1,SRG,YWHAB,MAPKAP3,MAPKAPK2,CDK1                                                                                                                                                                                                                                                                                                                                                                                                         |
| BIOCARTA RAS PATHWAY                                 | CASP9,HRAS,FOXO4,CHUK,RALA,RAF1,BCL2L1,ELK1,RELA,MAP2K1,RALBP1,RALGDS,AKT1,PIK3CA,RHOA,PLD1,MAPK3,BAD,NFKB1,PIK3CG,RAC1,PIK3R1,CDC42,                                                                                                                                                                                                                                                                                                                                                                                                                                 |

|                                                                |                                                                                                                                                                                                                                                                                                                                                                                                                                                                                                                                                                                                                                                                                                                                                                                                                                                                                                                                                                                                                                                                                                                                                                                                                                                                                                                                                                                                                                                                                                                                                                                                                                                                                                                                                                                |
|----------------------------------------------------------------|--------------------------------------------------------------------------------------------------------------------------------------------------------------------------------------------------------------------------------------------------------------------------------------------------------------------------------------------------------------------------------------------------------------------------------------------------------------------------------------------------------------------------------------------------------------------------------------------------------------------------------------------------------------------------------------------------------------------------------------------------------------------------------------------------------------------------------------------------------------------------------------------------------------------------------------------------------------------------------------------------------------------------------------------------------------------------------------------------------------------------------------------------------------------------------------------------------------------------------------------------------------------------------------------------------------------------------------------------------------------------------------------------------------------------------------------------------------------------------------------------------------------------------------------------------------------------------------------------------------------------------------------------------------------------------------------------------------------------------------------------------------------------------|
| KEGG MAPK SIGNALING PATHWAY                                    | <p>JUN,MEF2C,ELK4,ELK1,JUND,GADD45B,ZAK,STMN1,RRAS2,MAP3K5,MAP3K1,MAP3K3,MAP3K4,MAP3K7,MAP3K8,AKT1,AKT2,ARRB2,CD14,ARRB1,NRAS,DUSP16,CHP2,RASGRP3,NFKB2,NFKB1,MYC,NFATC4,MAPK14,FLNC,FLNA,KRAS,FLNB,PRKX,TRAF6,TGFB2,DUSP1,DUSP2,TGFB1,TRAF2,BDNF,TAB2,ECSIT,TGFB2,DUSP7,TGFB1,DUSP5,DUSP6,DUSP3,TGFB3,PLA2G4E,DUSP4,CACNG5,CACNG4,NF1,PLA2G12A,NFATC2,RASGRP4,MAP3K2,MAX,DUSP10,FGF9,FGF8,FGF7,FGF6,FGF5,FGF3,FGF4,FGF1,FGF2,PTPN5,FGF21,IL1R2,MAPK9,CACNA2D3,MAPK10,MAPK11,RASGRP2,PLA2G2A,MAP2K2,PLA2G4A,MAP2K3,MECOM,PLA2G5,MAPK13,MAP2K1,FGFR2,MAP2K7,RASA2,MAPK8IP2,RASGRF1,MAP2K5,RASGRF2,FGFR4,MAP2K6,MAPK8IP3,MAP3K6,CASP3,MAP3K12,FGFR3,FGFR1,RASA1,FGF14,RP6KA2,RPS6KA3,FGF17,FGF16,FGF10,GRB2,FGF11,FGF12,FGF13,PLA2G1B,RPS6KA1,MAPKAPK3,IKBK,HRAS,CACNG2,FGF23,CACNG3,MKNK2,FGF18,STK4,STK3,MAPK8IP1,MOS,RAP1A,MAPT,RAP1B,PPP3CB,PPP3CA,CACNA1H,CACNA1G,CACNA1I,ATF4,TAB1,FOS,TAOK2,RPS6KA6,PPP3R2,CACNG8,PPP5C,PPP3CC,CACNG6,PPP3R1,CACNG7,MAP2K4,ATF2,PDGFRB, JMJD7-PLA2G4B,MAP4K3,PLA2G6,PLA2G2E,PLA2G10,MAP4K4,RPS6KA5,BRAF,IKBKB,PLA2G4B,MAP3K11,CACNA2D2,IL1A,PLA2G2F,DAXX,AKT3,GADD45G,FGF20,RELB,MAPKAPK5,MAPK12,RELA,GNA12,HSPA8,HSPB1,PTPRR,LAMTOR3,GADD45A,NGF,DDIT3,MAP3K14,TAOK1,PDGFA,FGF22,PDGFB,NLK,PDGFRA,PRKACA,PRKACB,PAK1,PRKACG,CRK,CDC25B,CRKL,MAP3K13,PLA2G2D,CDC42,RASGRP1,CACNA2D1,CACNB1,SRF,CACNB2,SOS2,CACNB3,CACNB4,CHUK,CACNG1,PRKCB,RAF1,PRKCA,TNF,PAK2,MKNK1,PLA2G3,PRKCG,PTPN7,RAPGEF2,HSPA1L,CACNA1A,HSPA1B,RAC2,HSPA2,CACNA1D,CACNA1E,RAC3,CACNA1B,HSPA1A,PLA2G12B,CACNA1C,DUSP8,CACNA1F,CACNA1S,MAP4K1,TNFRSF1A,DUSP9,PPM1A,PPM1B,MAPK3,RPS6KA4,CACNA2D4,HSPA6,MAPK7,FGF19,RAC1,SOS1,MAPK1,DUSP14,MAP4K2,MAPK8,EGFR,MAPKAPK2,EGF,RRAS,TAOK3,GNNG12,NTF4,IL1B,MRAS,NTF3,IL1R1,TP53,FAS,NR4A1,PLA2G2C,FASLG,NTRK2,NTRK1,CHP</p> |
| BIOCARTA MAPK PATHWAY                                          | <p>MEF2C,JUN,MEF2D,MAX,MEF2BNB-MEF2B,CHUK,RAF1,MEF2A,STAT1,SHC1,ELK1,PAK2,CEBPA,MKNK1,MAP2K4,RIPK1,ATF2,RAPGEF2,MAPK9,MAP3K5,MAP4K3,MAPK10,MAPK11,MAP2K2,MAP4K4,BRAF,RPS6KA5,MAP2K3,MAP3K1,MAPK13,MAP3K3,MAP2K1,MAP3K4,MAP2K7,MAP3K10,MAP3K9,IKBKB,MAP2K5,MAP3K11,CREB1,MAP2K6,MAP3K7,MAP3K8,MAP3K12,MAP3K6,MAP4K1,MAP4K5,RPS6KA2,RPS6KA3,DAXX,RPS6KB1,RPS6KB2,GRB2,MAPK3,MAPK4,RPS6KA4,MAPK6,NFKB1,MAPK7,RAC1,NFKBIA,MYC,RPS6KA1,MAPK1,MAPKAPK3,HRAS,MAP4K2,MAPK8,MAPKAPK5,MAPK14,MAPK12,RELA,MAPKAPK2,TGFB2,MKNK2,TGFB1,TRAF2,ARAF,MAP3K14,TGFB1,TRADD,TGFB3,PAK1,SP1,MAP3K13,FOS,MAP3K2</p>                                                                                                                                                                                                                                                                                                                                                                                                                                                                                                                                                                                                                                                                                                                                                                                                                                                                                                                                                                                                                                                                                                                                                                                 |
| KEGG CELL CYCLE                                                | <p>CDC16,CDC7,CDC45,GADD45B,DBF4,ANAPC1,CREBBP,MDM2,ABL1,SMC1B,LOC728622,GADD45G,ATM,ATR,ANAPC7,RBL2,ANAPC5,RBL1,MYC,CDC14B,SMC1A,CDC14A,LOC731751,SKP1,TGFB2,TGFB1,GADD45A,STAG1,LOC650621,PLK1,RBX1,STAG2,TGFB3,MCM4,ORC6,CCND1,MAD1L1,MCM3,MCM6,MCM5,YWHAB,CCNA2,MCM7,BUB1,CHEK1,WEE2,MCM2,PTTG1,CDC27,CDC25B,CDC25C,LOC651610,CDK25A,CDK6,CDC20,BUB3,YWHAZ,CCND2,YWHAH,CCNB1,YWHAZ,YWHAH,CCNE1,ORC3,CCND3,PTTG2,SFN,E2F1,TFDP1,ZBTB17,CDK1,ESPL1,ANAPC10,RAD21,BUB1B,ANAPC11,RB1,SKP2,CUL1,SMAD3,SMAD4,ANAPC2,TFDP2,PRKDC,MAD2L1,ANAPC4,SMAD2,YWHAQ,CHEK2,CDC23,EP300,GSK3B,CDKN2A,CDKN1C,CDKN1B,CDKN1A,CDKN2D,CCNA1,CDKN2B,CDKN2C,FZR1,SMC3,ANAPC13,PCNA,TTK,PKMYT1,CDK2,CDC26,E2F5,CDK4,WEE1,E2F4,E2F3,TP53,E2F2,ORC1,ORC2,CCNE2,CDK6,ORC4,CCNB2,CDK7,MAD2L2,ORC5,HDAC1,HDAC2,CCNH,CCNB3,</p>                                                                                                                                                                                                                                                                                                                                                                                                                                                                                                                                                                                                                                                                                                                                                                                                                                                                                                                                                                            |
| MIPS SWI SNF CHROMATIN REMODELING RELATED BRCA1 COMPLEX        | ACTL6A,BRCA1,SMARCA2,SMARCA4,SMARCB1,SMARCC1,SMARCC2,SMARCD2,SMARCE1,ARID1A,ARID1B,                                                                                                                                                                                                                                                                                                                                                                                                                                                                                                                                                                                                                                                                                                                                                                                                                                                                                                                                                                                                                                                                                                                                                                                                                                                                                                                                                                                                                                                                                                                                                                                                                                                                                            |
| MIPS INO80 CHROMATIN REMODELING COMPLEX                        | ACTL6A,ACTR5,ACTR8,INO80C,INO80E,INO80D,INO80,MCRS1,NFRKB,RUVBL1,RUVBL2,TCF3,INO80B                                                                                                                                                                                                                                                                                                                                                                                                                                                                                                                                                                                                                                                                                                                                                                                                                                                                                                                                                                                                                                                                                                                                                                                                                                                                                                                                                                                                                                                                                                                                                                                                                                                                                            |
| MIPS SRCAP ASSOCIATED CHROMATIN REMODELING COMPLEX             | ACTL6A,ACTR6,EAF2,H2AFZ,RUVBL1,RUVBL2,SRCAP,VPS72,YEAT4,ZNHIT1                                                                                                                                                                                                                                                                                                                                                                                                                                                                                                                                                                                                                                                                                                                                                                                                                                                                                                                                                                                                                                                                                                                                                                                                                                                                                                                                                                                                                                                                                                                                                                                                                                                                                                                 |
| MIPS RNA POLYMERASE II COMPLEX CHROMATIN STRUCTURE MODIFYING   | CCNC,CDK8,DRAP1,GTF2B,GTF2E1,GTF2F1,GTF2H1,MED21,PCSK4,POLR2A,SMARCB1,SMARCC1,SMARCC2,TBP,SMARCA2,SMARCA4,SMARCD1,SMARCD2,SMARCD3                                                                                                                                                                                                                                                                                                                                                                                                                                                                                                                                                                                                                                                                                                                                                                                                                                                                                                                                                                                                                                                                                                                                                                                                                                                                                                                                                                                                                                                                                                                                                                                                                                              |
| MIPS RNA POLYMERASE II COMPLEX CHROMATIN STRUCTURE MODIFYING 1 | ACTL6A,CCNC,CDK8,MED21,SMARCB1,SMARCC1,SMARCC2,SMARCE1,SMARCD1,SMARCD2,SMARCD3,                                                                                                                                                                                                                                                                                                                                                                                                                                                                                                                                                                                                                                                                                                                                                                                                                                                                                                                                                                                                                                                                                                                                                                                                                                                                                                                                                                                                                                                                                                                                                                                                                                                                                                |



|                                                                |                                                                                                                                                                                                                                                                                                                                                                                                                             |
|----------------------------------------------------------------|-----------------------------------------------------------------------------------------------------------------------------------------------------------------------------------------------------------------------------------------------------------------------------------------------------------------------------------------------------------------------------------------------------------------------------|
| MIPS RNA POLYMERASE II COMPLEX CHROMATIN STRUCTURE MODIFYING 2 | CCNC,CDK8,CREBBP,ERCC3,ETF2B,ETF2F1,ETF2H3,MED21,KAT2B,POLR2A,SMARCA2,SMARCA4,SMARCB1                                                                                                                                                                                                                                                                                                                                       |
| KEGG AMINOACYL TRNA BIOSYNTHESIS                               | CARS2,DARS2,RARS,SARS,VARS2,YARS2,WARS,AARS,FARSA,HARS,SARS2,RARS2,NARS,LARS2,FARSB,AARS2,YARS,NARS2,GARS,IARS2,KARS,WARS2,TARSL2,LARS,VARS,PARS2,MARS2,CARS,IARS,TARS2,SEPSECS,MTFMT,TARS,DARS,HARS2,PSTK,QARS,EARS2,EPRS,FARS2,MARS,                                                                                                                                                                                      |
| PID NFKAPPABATYPICALPATHWAY                                    | PIK3CA,NFKB1,CSNK2B,SYK,CSNK2A1,PIK3R1,SSPO,MAPK14,LCK,NFKBIA,RELA,SRC,BCL3,IKBKB,ARRB2,REL,CSNK2A2,                                                                                                                                                                                                                                                                                                                        |
| PID NFKAPPABCANONICALPATHWAY                                   | CYLD,UBE2D3,TNFAIP3,NFKBIA,XPO1,MALT1,BIRC2,TRAF6,NOD2,PRKCA,RELA,RAN,TNF,IKBK,IKKB1,SSPO,IKKB,RIPK2,BCL10,CHUK,ATM,ERC1,TNFRSF1A,                                                                                                                                                                                                                                                                                          |
| MIPS TNF ALPHA NF KAPPA B SIGNALING COMPLEX                    | CHUK,IKBK,KPNA3,NFKB1,NFKB2,NFKBIA,NFKBIB,NFKBIE,RELA,RELB,TNIP2                                                                                                                                                                                                                                                                                                                                                            |
| MIPS TNF ALPHA NF KAPPA B SIGNALING COMPLEX 1                  | CHUK,FBXW7,IKKB,IKBK,MAP3K14,NFKB2,RELA,RELA,SEC16A,USP2                                                                                                                                                                                                                                                                                                                                                                    |
| MIPS TNF ALPHA NF KAPPA B SIGNALING COMPLEX 2                  | ANKRD28,BTRC,CHUK,CUL1,IKBE,NFKB2,PPP6C,RELA,RELA,PPP6R1,PPP6R2,SKP1                                                                                                                                                                                                                                                                                                                                                        |
| MIPS TNF ALPHA NF KAPPA B SIGNALING COMPLEX 3                  | CHUK,DDX3X,GLG1,ETF2I,IKBK,MAP3K8,NFKB1,NFKB2,NFKBIA,NFKBIB,RELA,RELB,RPL30,RPL6,RPS13,TNIP2,                                                                                                                                                                                                                                                                                                                               |
| MIPS TNF ALPHA NF KAPPA B SIGNALING COMPLEX 5                  | CD3EAP,CHUK,CUL1,FBXW11,IKKB,IKBK,IQGAP2,KPNA2,LRPPRC,MCC,MTIF2,NFKB1,NFKB2,NFKBIB,PDCD2,POLR1A,POLR1B,POLR1D,POLR1E,POLR2H,POLR2L,RASAL2,RELA,RELA,SKP1                                                                                                                                                                                                                                                                    |
| MIPS TNF ALPHA NF KAPPA B SIGNALING COMPLEX 6                  | CDC37,CHUK,FBL,HSP90AA1,HSP90AB1,IKKB,IKBK,MAP3K14,RPL30,RPL4,RPL6,RPL8,RPS11,RPS13,                                                                                                                                                                                                                                                                                                                                        |
| MIPS TNF ALPHA NF KAPPA B SIGNALING COMPLEX 10                 | ATG16L1,CCAR1,CDC37,CHUK,HSP90AA1,HSP90AB1,IKBK,NFKB1,TBK1,TXLNA                                                                                                                                                                                                                                                                                                                                                            |
| PID P53REGULATIONPATHWAY                                       | NEDD8,PPM1D,HIPK2,CHEK2,TP53,TP53AIP1,TRIM28,CCNG1,HUWE1,CSNK1E,SETD8,SKP2,ATM,CSE1L,CSNK1D,CSNK1A1,PPP2CA,CDK2,PIN1,CHEK1,SETD7,MDM4,KAT5,CCNA2,SMYD2,E4F1,EP300,PRMT5,KAT2B,PPP1R13L,CSNK1G1,RFWD2,KAT8,DAXX,DYRK2,TTC5,RPL5,RPL11,PRKCD,PPP2R4,MDM2,FBXO11,AKT1,CDKN2A,ATR,ABL1,CSNK1G2,GSK3B,CREBBP,RASSF1,MAPK14,MAPK9,RPL23,USP7,RCHY1,UBE2D1,CSNK1G3,YY1,MAPK8,                                                      |
| KEGG P53 SIGNALING PATHWAY                                     | CASP9,CASP8,SFN,TSC2,IGF1,CDK1,GADD45B,RCHY1,ZMAT3,IGFBP3,RRM2B,BAI1,TP73,SERPINE5,RPRM,PPM1D,BID,MDM4,BAX,MDM2,TP53AIP1,CASP3,TP53I3,PMAIP1,PIDD,RFWD2,PERP,GADD45G,EI24,SESN2,ATM,ATR,SESN3,CHEK2,APAF1,CDKN2A,RRM2,CDKN1A,BBC3,GADD45A,TNFRSF10B,DDB2,GTSE1,SHAH1,CCND1,CD82,PTE,N,CDK2,CHEK1,SESN1,CDK4,SERPINE1,TP53,CCNE2,FAS,CDK6,CYCS,STEAP3,CCNB2,LOC651610,CCND2,SHISA5,CCNB1,CCNG1,CCNE1,CCNB3,THBS1,CCNG2,CCND3 |
| BIOCARTA P53HYPOXIA PATHWAY                                    | MAPK8,CSNK1D,ABCB1,CSNK1A1,EP300,HSPA1A,BAX,DNAJB1P1,HIF1A,HIC1,MDM2,TAF1,CDKN1A,AKT1,TP53,NQO1,FHL2,GADD45A,HSP90AA1,IGFBP3,ATM,RPA1,NFKBIB,                                                                                                                                                                                                                                                                               |
| BIOCARTA P53 PATHWAY                                           | CCND1,BCL2,E2F1,APAF1,BAX,CDK2,CDK4,MDM2,RB1,CDKN1A,TP53,GADD45A,ATM,TIMP3,PCNA,CCNE1                                                                                                                                                                                                                                                                                                                                       |

Supplementary table 2. Potential drug combinations for two-drug therapies.

| gene2 expression | correlation | pval    | FDR     | associated drug    | associated drug mechanism                       | gene1 genomic alteration     | pathway                                                                                                                         | has Drug | data source |
|------------------|-------------|---------|---------|--------------------|-------------------------------------------------|------------------------------|---------------------------------------------------------------------------------------------------------------------------------|----------|-------------|
| ACVR1            | 0.81604649  | 0.00105 | 0.00468 | ZM-447439          | AURKB                                           | START->NOTCH1(mutation)      | KEGG TGF BETA SIGNALING PATHWAY                                                                                                 | yes      | CGP         |
| ACVR1C           | -0.68428075 | 0.0072  | 0.02789 | ZD-6474            | Abl, EGFR, Flt3, C-KIT, RET, VEGFR-1, KDR, FLT4 | START->NLGN4X(deletion)      | KEGG TGF BETA SIGNALING PATHWAY                                                                                                 | no       | CCLE        |
| ATP2A3           | 0.507696131 | 0.00665 | 0.01865 | AZ628              | BRAF                                            | START->BRAF(mutation)        | REACTOME SIGNALING BY NOTCH                                                                                                     | no       | CGP         |
| ATP2A3           | 0.332434996 | 0.00045 | 0.00233 | BMS-536924         | IGF1R                                           | START->CDKN2A(mutation)      | REACTOME SIGNALING BY NOTCH                                                                                                     | no       | CGP         |
| ATP2A3           | 0.473199858 | 0.00265 | 0.00955 | CI-1040            | MEK1/2                                          | START->BRAF(mutation)        | REACTOME SIGNALING BY NOTCH                                                                                                     | no       | CGP         |
| BAMBI            | 0.336383497 | 0.00015 | 0.00089 | Sunitinib          | PDGFRA, PDGFRB, VEGFR(KDR), KIT, FLT3           | START->CDKN2a(p14)(deletion) | PID TGFBRPATHWAY                                                                                                                | no       | CGP         |
| BCL2L1           | -0.79982864 | 0.001   | 0.00508 | Panobinostat       | HDAC                                            | START->IGLL5(deletion)       | KEGG JAK STAT SIGNALING PATHWAY,REACTOME APOPTOSIS,REACTOME INTRINSIC PATHWAY FOR APOPTOSIS,KEGG APOPTOSIS,BIOCARTA RAS PATHWAY | yes      | CCLE        |
| BCL2L1           | -0.41626215 | 0.0043  | 0.01839 | Panobinostat       | HDAC                                            | START->MAP4K4(mutation)      | KEGG JAK STAT SIGNALING PATHWAY,REACTOME APOPTOSIS,REACTOME INTRINSIC PATHWAY FOR APOPTOSIS,KEGG APOPTOSIS,BIOCARTA RAS PATHWAY | yes      | CCLE        |
| BCL2L1           | -0.3559616  | 0.0022  | 0.01033 | Panobinostat       | HDAC                                            | START->BRD2(mutation)        | KEGG JAK STAT SIGNALING PATHWAY,REACTOME APOPTOSIS,REACTOME INTRINSIC PATHWAY FOR APOPTOSIS,KEGG APOPTOSIS,BIOCARTA RAS PATHWAY | yes      | CCLE        |
| BDNF             | -0.33996417 | 0.002   | 0.00949 | AZD6244            | MEK                                             | START->BRAF(mutation)        | KEGG MAPK SIGNALING PATHWAY                                                                                                     | no       | CCLE        |
| BDNF             | -0.70129551 | 0.00435 | 0.01857 | Lapatinib          | EGFR, HER2                                      | START->ZBP2(amplication)     | KEGG MAPK SIGNALING PATHWAY                                                                                                     | no       | CCLE        |
| BDNF             | -0.34057326 | 0.00185 | 0.00886 | PD-0325901         | MEK                                             | START->BRAF(mutation)        | KEGG MAPK SIGNALING PATHWAY                                                                                                     | no       | CCLE        |
| BDNF             | 0.35020081  | 0.00915 | 0.02324 | SB590885           | BRAF                                            | START->BRAF(mutation)        | KEGG MAPK SIGNALING PATHWAY                                                                                                     | no       | CGP         |
| BIRC3            | -0.41421565 | 0.00015 | 0.00085 | AZD6244            | MEK                                             | START->BRAF(mutation)        | KEGG APOPTOSIS                                                                                                                  | no       | CCLE        |
| BIRC3            | -0.66826391 | 0.0086  | 0.03181 | Lapatinib          | EGFR, HER2                                      | START->ZBP2(amplication)     | KEGG APOPTOSIS                                                                                                                  | no       | CCLE        |
| BIRC3            | -0.50946028 | 0.0071  | 0.02759 | LBW242             | IAP                                             | START->SOX10(mutation)       | KEGG APOPTOSIS                                                                                                                  | no       | CCLE        |
| BIRC3            | -0.44012077 | 0.00005 | 0.00029 | PD-0325901         | MEK                                             | START->BRAF(mutation)        | KEGG APOPTOSIS                                                                                                                  | no       | CCLE        |
| BIRC3            | -0.35791139 | 0.00075 | 0.00391 | PLX4720            | RAF                                             | START->BRAF(mutation)        | KEGG APOPTOSIS                                                                                                                  | no       | CCLE        |
| BMP4             | 0.384243249 | 0.00465 | 0.01445 | MK-2206            | AKT1/2                                          | START->PIK3CA(mutation)      | KEGG TGF BETA SIGNALING PATHWAY,KEGG HEDGEHOG SIGNALING PATHWAY                                                                 | no       | CGP         |
| BMP5             | -0.76010604 | 0.00045 | 0.00242 | Lapatinib          | EGFR, HER2                                      | START->IKZF3(amplication)    | KEGG TGF BETA SIGNALING PATHWAY,KEGG HEDGEHOG SIGNALING PATHWAY                                                                 | no       | CCLE        |
| BMP5             | -0.6603267  | 0.0082  | 0.03075 | Lapatinib          | EGFR, HER2                                      | START->ZBP2(amplication)     | KEGG TGF BETA SIGNALING PATHWAY,KEGG HEDGEHOG SIGNALING PATHWAY                                                                 | no       | CCLE        |
| BMP5             | -0.65070601 | 0.00185 | 0.00886 | Lapatinib          | EGFR, HER2                                      | START->ERBB2(amplication)    | KEGG TGF BETA SIGNALING PATHWAY,KEGG HEDGEHOG SIGNALING PATHWAY                                                                 | no       | CCLE        |
| BMP5             | 0.338724864 | 0.00955 | 0.02394 | SB590885           | BRAF                                            | START->BRAF(mutation)        | KEGG TGF BETA SIGNALING PATHWAY,KEGG HEDGEHOG SIGNALING PATHWAY                                                                 | no       | CGP         |
| BMP7             | -0.82641956 | 0.0002  | 0.00113 | ZD-6474            | Abl, EGFR, Flt3, C-KIT, RET, VEGFR-1, KDR, FLT4 | START->NLGN4X(deletion)      | KEGG TGF BETA SIGNALING PATHWAY,KEGG HEDGEHOG SIGNALING PATHWAY                                                                 | no       | CCLE        |
| BMPR1B           | -0.74639567 | 0.0085  | 0.03154 | ZD-6474            | Abl, EGFR, Flt3, C-KIT, RET, VEGFR-1, KDR, FLT4 | START->NLGN4X(deletion)      | KEGG TGF BETA SIGNALING PATHWAY                                                                                                 | no       | CCLE        |
| BTC              | -0.3032399  | 0.0034  | 0.01508 | RAF265             | Raf kinase B, KDR                               | START->BRAF(mutation)        | REACTOME PI3K EVENTS IN ERBB4 SIGNALING,REACTOME PI3K EVENTS IN ERBB2 SIGNALING                                                 | no       | CCLE        |
| BUB1             | 0.305351213 | 0       | 0       | RDEA119            | MEK1/2                                          | START->CDKN2A(mutation)      | KEGG CELL CYCLE                                                                                                                 | no       | CGP         |
| CACNA2D3         | 0.401785224 | 0.0012  | 0.0052  | AKT_inhibitor_VIII | AKT1/2                                          | START->PIK3CA(mutation)      | KEGG MAPK SIGNALING PATHWAY                                                                                                     | yes      | CGP         |

|        |             |         |                            |                                                 |                              |                                                                                                                                                                                                                                                                                                   |     |      |
|--------|-------------|---------|----------------------------|-------------------------------------------------|------------------------------|---------------------------------------------------------------------------------------------------------------------------------------------------------------------------------------------------------------------------------------------------------------------------------------------------|-----|------|
| CAPN2  | 0.721214255 | 0.0098  | 0.02435 ZM-447439          | AURKB                                           | START->NOTCH1(mutation)      | KEGG APOPTOSIS                                                                                                                                                                                                                                                                                    | no  | CGP  |
| CAV1   | 0.60941389  | 0.0048  | 0.01479 GDC-0449           | SMO                                             | START->EWS_FLI1(mutation)    | PID TGFBPATHWAY,PID WNT CANONICAL PATHWAY                                                                                                                                                                                                                                                         | no  | CGP  |
| CAV1   | -0.64991448 | 0.00885 | 0.03246 Lapatinib          | EGFR, HER2                                      | START->ZBP2(amplication)     | PID TGFBPATHWAY,PID WNT CANONICAL PATHWAY                                                                                                                                                                                                                                                         | no  | CCLE |
| CAV1   | 0.31345057  | 0.003   | 0.01051 Sunitinib          | PDGFRA, PDGFRB, VEGFR(KDR), KIT, FLT3           | START->CDKN2a(p14)(deletion) | PID TGFBPATHWAY,PID WNT CANONICAL PATHWAY                                                                                                                                                                                                                                                         | no  | CGP  |
| CBLB   | -0.78873363 | 0.0034  | 0.01508 ZD-6474            | Abl, EGFR, Flt3, C-KIT, RET, VEGFR-1, KDR, FLT4 | START->NLGN4X(deletion)      | KEGG JAK STAT SIGNALING PATHWAY                                                                                                                                                                                                                                                                   | no  | CCLE |
| CBLC   | -0.89037798 | 0.0079  | 0.02993 Irinotecan         | Topoisomerase I                                 | START->TARP(deletion)        | KEGG JAK STAT SIGNALING PATHWAY                                                                                                                                                                                                                                                                   | no  | CCLE |
| CCND1  | -0.55958986 | 0.00375 | 0.0164 TAE684              | ALK                                             | START->HDHD1(deletion)       | KEGG WNT SIGNALING PATHWAY,BIOCARTA WNT PATHWAY,KEGG JAK STAT SIGNALING PATHWAY,PID NOTCH PATHWAY,REACTOME SIGNALING BY NOTCH,KEGG CELL CYCLE,KEGG P53 SIGNALING PATHWAY,BIOCARTA P53 PATHWAY                                                                                                     | yes | CCLE |
| CCNE1  | 0.627121334 | 0.00315 | 0.01091 AZD-2281           | PARP1/2                                         | START->EWS_FLI1(mutation)    | REACTOME G1 S TRANSITION,REACTOME P53 DEPENDENT G1 DNA DAMAGE RESPONSE,KEGG CELL CYCLE,KEGG P53 SIGNALING PATHWAY,BIOCARTA P53 PATHWAY                                                                                                                                                            | no  | CGP  |
| CD14   | -0.38335032 | 0.00645 | 0.02556 Panobinostat       | HDAC                                            | START->MAP4K4(mutation)      | KEGG MAPK SIGNALING PATHWAY                                                                                                                                                                                                                                                                       | no  | CCLE |
| CD14   | 0.319057155 | 0.0033  | 0.0113 SB590885            | BRAF                                            | START->BRAF(mutation)        | KEGG MAPK SIGNALING PATHWAY                                                                                                                                                                                                                                                                       | no  | CGP  |
| CDC14B | 0.358699063 | 0.008   | 0.02117 MK-2206            | AKT1/2                                          | START->PIK3CA(mutation)      | KEGG CELL CYCLE                                                                                                                                                                                                                                                                                   | no  | CGP  |
| CDC14B | 0.824688    | 0.0015  | 0.00618 ZM-447439          | AURKB                                           | START->NOTCH1(mutation)      | KEGG CELL CYCLE                                                                                                                                                                                                                                                                                   | no  | CGP  |
| CDC6   | 0.882829208 | 0       | 0 ABT-263                  | BCL2, BCL-XL, BCL-W                             | START->NOTCH1(mutation)      | REACTOME G1 S TRANSITION,KEGG CELL CYCLE                                                                                                                                                                                                                                                          | no  | CGP  |
| CDH1   | 0.871516959 | 0.0042  | 0.01344 ABT-263            | BCL2, BCL-XL, BCL-W                             | START->NOTCH1(mutation)      | BIOCARTA TGFB PATHWAY,REACTOME APOPTOSIS                                                                                                                                                                                                                                                          | no  | CGP  |
| CDKN1A | -0.68261259 | 0.00655 | 0.02589 Panobinostat       | HDAC                                            | START->RARA(mutation)        | PID NOTCH PATHWAY,REACTOME G1 S TRANSITION,REACTOME P53 DEPENDENT G1 DNA DAMAGE RESPONSE,REACTOME PI3K EVENTS IN ERBB4 SIGNALING,REACTOME PI3K EVENTS IN ERBB2 SIGNALING,REACTOME PI3K AKT ACTIVATION,KEGG CELL CYCLE,KEGG P53 SIGNALING PATHWAY,BIOCARTA P53HYPOXIA PATHWAY,BIOCARTA P53 PATHWAY | no  | CCLE |
| CDKN1C | -0.59304778 | 0.00755 | 0.02894 Lapatinib          | EGFR, HER2                                      | START->ZBP2(amplication)     | KEGG CELL CYCLE                                                                                                                                                                                                                                                                                   | no  | CCLE |
| CDT1   | 0.30974866  | 0.0014  | 0.00587 MG-132             | Proteasome                                      | START->CDKN2A(mutation)      | REACTOME G1 S TRANSITION                                                                                                                                                                                                                                                                          | no  | CGP  |
| CDT1   | 0.301706116 | 0       | 0 RDEA119                  | MEK1/2                                          | START->CDKN2A(mutation)      | REACTOME G1 S TRANSITION                                                                                                                                                                                                                                                                          | no  | CGP  |
| CEBPA  | 0.587964067 | 0.0075  | 0.02025 GDC-0449           | SMO                                             | START->EWS_FLI1(mutation)    | BIOCARTA MAPK PATHWAY                                                                                                                                                                                                                                                                             | no  | CGP  |
| CEBPA  | 0.773805054 | 0.00165 | 0.00662 ZM-447439          | AURKB                                           | START->NOTCH1(mutation)      | BIOCARTA MAPK PATHWAY                                                                                                                                                                                                                                                                             | no  | CGP  |
| CGN    | -0.76429387 | 0.0066  | 0.02605 Topotecan          | Topoisomerase I                                 | START->IGLL5(deletion)       | REACTOME TGF BETA RECEPTOR SIGNALING IN EMT EPITHELIAL TO MESENCHYMAL TRANSITION,REACTOME SIGNALING BY TGF BETA RECEPTOR COMPLEX                                                                                                                                                                  | no  | CCLE |
| CISH   | 0.426142597 | 0.00805 | 0.02127 CI-1040            | MEK1/2                                          | START->BRAF(mutation)        | KEGG JAK STAT SIGNALING PATHWAY                                                                                                                                                                                                                                                                   | no  | CGP  |
| CISH   | 0.403495237 | 0.0011  | 0.00486 SB590885           | BRAF                                            | START->BRAF(mutation)        | KEGG JAK STAT SIGNALING PATHWAY                                                                                                                                                                                                                                                                   | no  | CGP  |
| CSF2RA | -0.79677292 | 0.00685 | 0.02684 Topotecan          | Topoisomerase I                                 | START->NCRNA00226(deletion)  | KEGG JAK STAT SIGNALING PATHWAY                                                                                                                                                                                                                                                                   | yes | CCLE |
| CTBP2  | 0.876060207 | 0.003   | 0.01051 ABT-263            | BCL2, BCL-XL, BCL-W                             | START->NOTCH1(mutation)      | KEGG WNT SIGNALING PATHWAY,KEGG NOTCH SIGNALING PATHWAY                                                                                                                                                                                                                                           | no  | CGP  |
| CTBP2  | -0.5208098  | 0.0077  | 0.02937 TAE684             | ALK                                             | START->HDHD1(deletion)       | KEGG WNT SIGNALING PATHWAY,KEGG NOTCH SIGNALING PATHWAY                                                                                                                                                                                                                                           | no  | CCLE |
| CTGF   | 0.465306728 | 0.0005  | 0.00255 AKT_inhibitor_VIII | AKT1/2                                          | START->PIK3CA(mutation)      | PID TGFBPATHWAY                                                                                                                                                                                                                                                                                   | no  | CGP  |
| CTGF   | 0.371992048 | 0.0092  | 0.02331 AZD6244            | MEK1/2                                          | START->BRAF(mutation)        | PID TGFBPATHWAY                                                                                                                                                                                                                                                                                   | no  | CGP  |

|        |             |         |         |                    |                                                 |                              |                                                                            |     |      |
|--------|-------------|---------|---------|--------------------|-------------------------------------------------|------------------------------|----------------------------------------------------------------------------|-----|------|
| CTGF   | -0.56418999 | 0.00085 | 0.00438 | TAE684             | ALK                                             | START->HDHD1(deletion)       | PID TGFBRPATHWAY                                                           | no  | CCLE |
| CTHRC1 | -0.67245035 | 0.0014  | 0.00689 | Lapatinib          | EGFR, HER2                                      | START->ERBB2(amplication)    | PID WNT SIGNALING PATHWAY,PID WNT NONCANONICAL PATHWAY                     | no  | CCLE |
| CTHRC1 | -0.63569103 | 0.0084  | 0.03128 | Lapatinib          | EGFR, HER2                                      | START->ZPBP2(amplication)    | PID WNT SIGNALING PATHWAY,PID WNT NONCANONICAL PATHWAY                     | no  | CCLE |
| CTHRC1 | -0.63221649 | 0.00515 | 0.02131 | Lapatinib          | EGFR, HER2                                      | START->IKZF3(amplication)    | PID WNT SIGNALING PATHWAY,PID WNT NONCANONICAL PATHWAY                     | no  | CCLE |
| CTHRC1 | -0.4316946  | 0.0093  | 0.0337  | TAE684             | ALK                                             | START->HDHD1(deletion)       | PID WNT SIGNALING PATHWAY,PID WNT NONCANONICAL PATHWAY                     | no  | CCLE |
| DAB2   | 0.510295518 | 0.00015 | 0.00089 | AKT_inhibitor_VIII | AKT1/2                                          | START->PIK3CA(mutation)      | PID TGFBRPATHWAY                                                           | no  | CGP  |
| DAPK3  | -0.3191658  | 0.00735 | 0.02835 | RAF265             | Raf kinase B, KDR                               | START->BRAF(mutation)        | REACTOME REGULATION OF APOPTOSIS,REACTOME APOPTOSIS                        | yes | CCLE |
| DAPK3  | -0.84501049 | 0.0014  | 0.00689 | Topotecan          | Topoisomerase I                                 | START->NCRNA00226(deletion)  | REACTOME REGULATION OF APOPTOSIS,REACTOME APOPTOSIS                        | yes | CCLE |
| DCC    | -0.74519524 | 0.0049  | 0.02047 | ZD-6474            | Abl, EGFR, Flt3, C-KIT, RET, VEGFR-1, KDR, FLT4 | START->NLGN4X(deletion)      | REACTOME REGULATION OF APOPTOSIS,REACTOME APOPTOSIS                        | no  | CCLE |
| DLK1   | 0.953314631 | 0.0015  | 0.00618 | Lapatinib          | EGFR, ERBB2                                     | START->SMAD4(mutation)       | PID NOTCH PATHWAY,REACTOME SIGNALING BY NOTCH                              | no  | CGP  |
| DLL1   | -0.32536747 | 0.0011  | 0.00555 | PLX4720            | RAF                                             | START->BRAF(mutation)        | PID NOTCH PATHWAY,KEGG NOTCH SIGNALING PATHWAY,REACTOME SIGNALING BY NOTCH | no  | CCLE |
| DLL3   | 0.803577242 | 0.0056  | 0.01651 | ABT-263            | BCL2, BCL-XL, BCL-W                             | START->NOTCH1(mutation)      | PID NOTCH PATHWAY,KEGG NOTCH SIGNALING PATHWAY                             | no  | CGP  |
| DLL3   | -0.53410576 | 0.0012  | 0.006   | TAE684             | ALK                                             | START->HDHD1(deletion)       | PID NOTCH PATHWAY,KEGG NOTCH SIGNALING PATHWAY                             | no  | CCLE |
| DNER   | -0.62842692 | 0.0024  | 0.01116 | Lapatinib          | EGFR, HER2                                      | START->IKZF3(amplication)    | PID NOTCH PATHWAY,REACTOME SIGNALING BY NOTCH                              | no  | CCLE |
| DNER   | -0.59190681 | 0.00755 | 0.02894 | Lapatinib          | EGFR, HER2                                      | START->ZPBP2(amplication)    | PID NOTCH PATHWAY,REACTOME SIGNALING BY NOTCH                              | no  | CCLE |
| DSG2   | 0.786307803 | 0.00015 | 0.00089 | ABT-263            | BCL2, BCL-XL, BCL-W                             | START->NOTCH1(mutation)      | REACTOME APOPTOSIS                                                         | no  | CGP  |
| DSG2   | 0.312524315 | 0.00155 | 0.00633 | PF-02341066        | MET, ALK                                        | START->CDKN2a(p14)(deletion) | REACTOME APOPTOSIS                                                         | no  | CGP  |
| DSP    | 0.87064894  | 0.00365 | 0.01217 | ABT-263            | BCL2, BCL-XL, BCL-W                             | START->NOTCH1(mutation)      | REACTOME APOPTOSIS                                                         | no  | CGP  |
| DSP    | -0.31780542 | 0.00425 | 0.01821 | PLX4720            | RAF                                             | START->BRAF(mutation)        | REACTOME APOPTOSIS                                                         | no  | CCLE |
| DTX4   | 0.556636301 | 0.0044  | 0.01388 | GW_441756          | NTRK1                                           | START->STK11(mutation)       | KEGG NOTCH SIGNALING PATHWAY,REACTOME SIGNALING BY NOTCH                   | no  | CGP  |
| DUSP1  | 0.403773657 | 0.00215 | 0.00815 | AKT_inhibitor_VIII | AKT1/2                                          | START->PIK3CA(mutation)      | KEGG MAPK SIGNALING PATHWAY                                                | no  | CGP  |
| DUSP1  | 0.427916315 | 0.003   | 0.01051 | AZD6244            | MEK1/2                                          | START->BRAF(mutation)        | KEGG MAPK SIGNALING PATHWAY                                                | no  | CGP  |
| DUSP1  | -0.33608705 | 0.0021  | 0.00991 | AZD6244            | MEK                                             | START->BRAF(mutation)        | KEGG MAPK SIGNALING PATHWAY                                                | no  | CCLE |
| DUSP1  | -0.36957179 | 0.00095 | 0.00485 | PD-0325901         | MEK                                             | START->BRAF(mutation)        | KEGG MAPK SIGNALING PATHWAY                                                | no  | CCLE |
| DUSP1  | -0.34104846 | 0.00135 | 0.00667 | PLX4720            | RAF                                             | START->BRAF(mutation)        | KEGG MAPK SIGNALING PATHWAY                                                | no  | CCLE |
| DUSP1  | 0.507402309 | 0.00005 | 0.00032 | SB590885           | BRAF                                            | START->BRAF(mutation)        | KEGG MAPK SIGNALING PATHWAY                                                | no  | CGP  |
| DUSP1  | -0.86536438 | 0.0019  | 0.00907 | ZD-6474            | Abl, EGFR, Flt3, C-KIT, RET, VEGFR-1, KDR, FLT4 | START->NLGN4X(deletion)      | KEGG MAPK SIGNALING PATHWAY                                                | no  | CCLE |
| DUSP4  | 0.941497121 | 0.00275 | 0.00983 | Lapatinib          | EGFR, ERBB2                                     | START->SMAD4(mutation)       | KEGG MAPK SIGNALING PATHWAY                                                | no  | CGP  |
| DUSP5  | 0.971346555 | 0.00145 | 0.00602 | Lapatinib          | EGFR, ERBB2                                     | START->SMAD4(mutation)       | KEGG MAPK SIGNALING PATHWAY                                                | no  | CGP  |
| DUSP5  | 0.381131502 | 0.00805 | 0.02127 | PLX4720            | BRAF                                            | START->BRAF(mutation)        | KEGG MAPK SIGNALING PATHWAY                                                | no  | CGP  |
| DUSP6  | 0.48002835  | 0.0004  | 0.0021  | AKT_inhibitor_VIII | AKT1/2                                          | START->PIK3CA(mutation)      | KEGG MAPK SIGNALING PATHWAY                                                | no  | CGP  |
| DUSP6  | -0.30702927 | 0.0094  | 0.03397 | Panobinostat       | HDAC                                            | START->BRD2(mutation)        | KEGG MAPK SIGNALING PATHWAY                                                | no  | CCLE |
| DUSP9  | -0.45608402 | 0.00955 | 0.03437 | Lapatinib          | EGFR, HER2                                      | START->ERBB2(amplication)    | KEGG MAPK SIGNALING PATHWAY                                                | no  | CCLE |

|        |             |         |         |              |                                       |                              |                                                                                                                                  |     |      |
|--------|-------------|---------|---------|--------------|---------------------------------------|------------------------------|----------------------------------------------------------------------------------------------------------------------------------|-----|------|
| EAF2   | 0.318342639 | 0.00085 | 0.00395 | MG-132       | Proteasome                            | START->CDKN2A(mutation)      | MIPS SRCAP ASSOCIATED CHROMATIN REMODELING COMPLEX                                                                               | no  | CGP  |
| EGF    | 0.507864952 | 0.00525 | 0.01579 | GW_441756    | NTRK1                                 | START->STK11(mutation)       | REACTOME PI3K EVENTS IN ERBB2 SIGNALING,KEGG MAPK SIGNALING PATHWAY                                                              | yes | CGP  |
| EGFR   | 0.468007362 | 0.0013  | 0.00554 | AZD6244      | MEK1/2                                | START->BRAF(mutation)        | REACTOME PI3K EVENTS IN ERBB2 SIGNALING,KEGG MAPK SIGNALING PATHWAY                                                              | yes | CGP  |
| EGFR   | -0.3397728  | 0.0019  | 0.00907 | AZD6244      | MEK                                   | START->BRAF(mutation)        | REACTOME PI3K EVENTS IN ERBB2 SIGNALING,KEGG MAPK SIGNALING PATHWAY                                                              | yes | CCLE |
| EGFR   | -0.31294745 | 0.0043  | 0.01839 | PD-0325901   | MEK                                   | START->BRAF(mutation)        | REACTOME PI3K EVENTS IN ERBB2 SIGNALING,KEGG MAPK SIGNALING PATHWAY                                                              | yes | CCLE |
| EGFR   | -0.38408421 | 0.0001  | 0.00058 | PLX4720      | RAF                                   | START->BRAF(mutation)        | REACTOME PI3K EVENTS IN ERBB2 SIGNALING,KEGG MAPK SIGNALING PATHWAY                                                              | yes | CCLE |
| EGFR   | 0.352970231 | 0.00895 | 0.02289 | RDEA119      | MEK1/2                                | START->BRAF(mutation)        | REACTOME PI3K EVENTS IN ERBB2 SIGNALING,KEGG MAPK SIGNALING PATHWAY                                                              | yes | CGP  |
| EGFR   | 0.609447994 | 0       | 0       | SB590885     | BRAF                                  | START->BRAF(mutation)        | REACTOME PI3K EVENTS IN ERBB2 SIGNALING,KEGG MAPK SIGNALING PATHWAY                                                              | yes | CGP  |
| EGFR   | -0.49847358 | 0.0043  | 0.01839 | TAE684       | ALK                                   | START->HDHD1(deletion)       | REACTOME PI3K EVENTS IN ERBB2 SIGNALING,KEGG MAPK SIGNALING PATHWAY                                                              | yes | CCLE |
| EGLN3  | 0.476573008 | 0.00145 | 0.00602 | AZD6244      | MEK1/2                                | START->BRAF(mutation)        | PID HIF1APATHWAY                                                                                                                 | yes | CGP  |
| EGLN3  | 0.49725094  | 0.00195 | 0.00756 | CI-1040      | MEK1/2                                | START->BRAF(mutation)        | PID HIF1APATHWAY                                                                                                                 | yes | CGP  |
| EGLN3  | 0.376552579 | 0.00875 | 0.02253 | PLX4720      | BRAF                                  | START->BRAF(mutation)        | PID HIF1APATHWAY                                                                                                                 | yes | CGP  |
| EGLN3  | 0.489859729 | 0.00005 | 0.00032 | SB590885     | BRAF                                  | START->BRAF(mutation)        | PID HIF1APATHWAY                                                                                                                 | yes | CGP  |
| ENDOD1 | -0.38041627 | 0.00125 | 0.00623 | Panobinostat | HDAC                                  | START->BRD2(mutation)        | KEGG APOPTOSIS                                                                                                                   | no  | CCLE |
| ENDOD1 | 0.339769167 | 0.0003  | 0.00164 | Sunitinib    | PDGFRA, PDGFRB, VEGFR(KDR), KIT, FLT3 | START->CDKN2a(p14)(deletion) | KEGG APOPTOSIS                                                                                                                   | no  | CGP  |
| ENDOD1 | 0.317657602 | 0.0026  | 0.00943 | VX-680       | Aurora A/B/C, FLT3, ABL1, JAK2        | START->CDKN2a(p14)(deletion) | KEGG APOPTOSIS                                                                                                                   | no  | CGP  |
| ERBB2  | -0.51209165 | 0       | 0       | Panobinostat | HDAC                                  | START->BRD2(mutation)        | REACTOME PI3K EVENTS IN ERBB2 SIGNALING                                                                                          | yes | CCLE |
| ERBB2  | -0.40518199 | 0.0059  | 0.0238  | Panobinostat | HDAC                                  | START->MAP4K4(mutation)      | REACTOME PI3K EVENTS IN ERBB2 SIGNALING                                                                                          | yes | CCLE |
| ERBB2  | -0.32813544 | 0.00205 | 0.0097  | PLX4720      | RAF                                   | START->BRAF(mutation)        | REACTOME PI3K EVENTS IN ERBB2 SIGNALING                                                                                          | yes | CCLE |
| ERBB4  | -0.32239503 | 0.0022  | 0.01033 | AZD6244      | MEK                                   | START->BRAF(mutation)        | REACTOME PI3K EVENTS IN ERBB4 SIGNALING,REACTOME PI3K EVENTS IN ERBB2 SIGNALING                                                  | no  | CCLE |
| ERBB4  | 0.660318194 | 0.00375 | 0.01241 | GDC-0449     | SMO                                   | START->EWS_FLI1(mutation)    | REACTOME PI3K EVENTS IN ERBB4 SIGNALING,REACTOME PI3K EVENTS IN ERBB2 SIGNALING                                                  | no  | CGP  |
| ERBB4  | 0.846548031 | 0.0071  | 0.01953 | Lapatinib    | EGFR, ERBB2                           | START->SMAD4(mutation)       | REACTOME PI3K EVENTS IN ERBB4 SIGNALING,REACTOME PI3K EVENTS IN ERBB2 SIGNALING                                                  | no  | CGP  |
| ERBB4  | -0.38149077 | 0.0002  | 0.00113 | PD-0325901   | MEK                                   | START->BRAF(mutation)        | REACTOME PI3K EVENTS IN ERBB4 SIGNALING,REACTOME PI3K EVENTS IN ERBB2 SIGNALING                                                  | no  | CCLE |
| EREG   | 0.428736452 | 0.0055  | 0.0163  | AZ628        | BRAF                                  | START->BRAF(mutation)        | REACTOME PI3K EVENTS IN ERBB4 SIGNALING,REACTOME PI3K EVENTS IN ERBB2 SIGNALING                                                  | no  | CGP  |
| EREG   | 0.538315583 | 0       | 0       | MK-2206      | AKT1/2                                | START->PIK3CA(mutation)      | REACTOME PI3K EVENTS IN ERBB4 SIGNALING,REACTOME PI3K EVENTS IN ERBB2 SIGNALING                                                  | no  | CGP  |
| EREG   | -0.3275589  | 0.005   | 0.02081 | Panobinostat | HDAC                                  | START->BRD2(mutation)        | REACTOME PI3K EVENTS IN ERBB4 SIGNALING,REACTOME PI3K EVENTS IN ERBB2 SIGNALING                                                  | no  | CCLE |
| EREG   | 0.365092083 | 0.00525 | 0.01579 | SB590885     | BRAF                                  | START->BRAF(mutation)        | REACTOME PI3K EVENTS IN ERBB4 SIGNALING,REACTOME PI3K EVENTS IN ERBB2 SIGNALING                                                  | no  | CGP  |
| F11R   | 0.771821626 | 0.00755 | 0.02034 | ABT-263      | BCL2, BCL-XL, BCL-W                   | START->NOTCH1(mutation)      | REACTOME TGF BETA RECEPTOR SIGNALING IN EMT EPITHELIAL TO MESENCHYMAL TRANSITION,REACTOME SIGNALING BY TGF BETA RECEPTOR COMPLEX | no  | CGP  |
| FAS    | 0.568362811 | 0.00815 | 0.02145 | AZD-2281     | PARP1/2                               | START->EWS_FLI1(mutation)    | REACTOME APOPTOSIS,KEGG APOPTOSIS,KEGG MAPK SIGNALING PATHWAY,KEGG P53 SIGNALING PATHWAY                                         | no  | CGP  |
| FGF13  | 0.663606434 | 0.0019  | 0.00741 | GDC-0449     | SMO                                   | START->EWS_FLI1(mutation)    | KEGG MAPK SIGNALING PATHWAY                                                                                                      | no  | CGP  |

|       |             |         |         |                    |                                                 |                           |                                                                                                              |     |      |
|-------|-------------|---------|---------|--------------------|-------------------------------------------------|---------------------------|--------------------------------------------------------------------------------------------------------------|-----|------|
| FGF18 | -0.49533285 | 0.00295 | 0.01336 | Lapatinib          | EGFR, HER2                                      | START->ZPBP2(amplication) | REACTOME PI3K CASCADE,KEGG MAPK SIGNALING PATHWAY                                                            | no  | CCLE |
| FGF18 | -0.32013246 | 0.0034  | 0.01508 | PD-0325901         | MEK                                             | START->BRAF(mutation)     | REACTOME PI3K CASCADE,KEGG MAPK SIGNALING PATHWAY                                                            | no  | CCLE |
| FGF18 | -0.3329659  | 0.00065 | 0.00342 | PLX4720            | RAF                                             | START->BRAF(mutation)     | REACTOME PI3K CASCADE,KEGG MAPK SIGNALING PATHWAY                                                            | no  | CCLE |
| FGF9  | -0.59175085 | 0.00805 | 0.03035 | Lapatinib          | EGFR, HER2                                      | START->ZPBP2(amplication) | REACTOME PI3K CASCADE,KEGG MAPK SIGNALING PATHWAY                                                            | no  | CCLE |
| FGFR1 | -0.65407406 | 0.0032  | 0.01432 | Lapatinib          | EGFR, HER2                                      | START->ERBB2(amplication) | REACTOME PI3K CASCADE,KEGG MAPK SIGNALING PATHWAY                                                            | yes | CCLE |
| FGFR1 | -0.60033003 | 0.0076  | 0.02908 | Lapatinib          | EGFR, HER2                                      | START->IKZF3(amplication) | REACTOME PI3K CASCADE,KEGG MAPK SIGNALING PATHWAY                                                            | yes | CCLE |
| FGFR1 | -0.61019731 | 0.00015 | 0.00085 | TAE684             | ALK                                             | START->HDHD1(deletion)    | REACTOME PI3K CASCADE,KEGG MAPK SIGNALING PATHWAY                                                            | yes | CCLE |
| FGFR2 | 0.546387934 | 0.0019  | 0.00741 | GW_441756          | NTRK1                                           | START->STK11(mutation)    | REACTOME PI3K CASCADE,KEGG MAPK SIGNALING PATHWAY                                                            | yes | CGP  |
| FGFR2 | -0.33049928 | 0.002   | 0.00949 | PD-0325901         | MEK                                             | START->BRAF(mutation)     | REACTOME PI3K CASCADE,KEGG MAPK SIGNALING PATHWAY                                                            | yes | CCLE |
| FGFR2 | -0.38385253 | 0.00005 | 0.00029 | PLX4720            | RAF                                             | START->BRAF(mutation)     | REACTOME PI3K CASCADE,KEGG MAPK SIGNALING PATHWAY                                                            | yes | CCLE |
| FGFR3 | -0.32269356 | 0.0021  | 0.00991 | PLX4720            | RAF                                             | START->BRAF(mutation)     | REACTOME PI3K CASCADE,KEGG MAPK SIGNALING PATHWAY                                                            | yes | CCLE |
| FHL2  | 0.774158395 | 0.0086  | 0.02224 | ABT-263            | BCL2, BCL-XL, BCL-W                             | START->NOTCH1(mutation)   | BIOCARTA P53HYPOXIA PATHWAY                                                                                  | no  | CGP  |
| FHL2  | -0.51699634 | 0.0062  | 0.02476 | TAE684             | ALK                                             | START->HDHD1(deletion)    | BIOCARTA P53HYPOXIA PATHWAY                                                                                  | no  | CCLE |
| FLNA  | 0.89355029  | 0.00745 | 0.02016 | Lapatinib          | EGFR, ERBB2                                     | START->SMAD4(mutation)    | PID WNT NONCANONICAL PATHWAY,KEGG MAPK SIGNALING PATHWAY                                                     | no  | CGP  |
| FLNB  | 0.393465791 | 0.0057  | 0.01673 | AZD6244            | MEK1/2                                          | START->BRAF(mutation)     | KEGG MAPK SIGNALING PATHWAY                                                                                  | no  | CGP  |
| FLNB  | 0.503471694 | 0.00025 | 0.0014  | SB590885           | BRAF                                            | START->BRAF(mutation)     | KEGG MAPK SIGNALING PATHWAY                                                                                  | no  | CGP  |
| FLNC  | 0.387839752 | 0.00155 | 0.00633 | SB590885           | BRAF                                            | START->BRAF(mutation)     | KEGG MAPK SIGNALING PATHWAY                                                                                  | no  | CGP  |
| FOS   | -0.80819866 | 0.00505 | 0.02098 | ZD-6474            | Abl, EGFR, Flt3, C-KIT, RET, VEGFR-1, KDR, FLT4 | START->NLGN4X(deletion)   | KEGG MAPK SIGNALING PATHWAY,BIOCARTA MAPK PATHWAY                                                            | yes | CCLE |
| FOSL1 | 0.476134194 | 0.0003  | 0.00164 | AKT_inhibitor_VIII | AKT1/2                                          | START->PIK3CA(mutation)   | KEGG WNT SIGNALING PATHWAY                                                                                   | no  | CGP  |
| FOSL1 | 0.378708409 | 0.005   | 0.01525 | MK-2206            | AKT1/2                                          | START->PIK3CA(mutation)   | KEGG WNT SIGNALING PATHWAY                                                                                   | no  | CGP  |
| FOXO1 | 0.763814435 | 0.00345 | 0.01169 | ZM-447439          | AURKB                                           | START->NOTCH1(mutation)   | REACTOME PI3K EVENTS IN ERBB4 SIGNALING,REACTOME PI3K EVENTS IN ERBB2 SIGNALING,REACTOME PI3K AKT ACTIVATION | no  | CGP  |
| FST   | -0.96841221 | 0.0085  | 0.03154 | Irinotecan         | Topoisomerase I                                 | START->TARP(deletion)     | KEGG TGF BETA SIGNALING PATHWAY                                                                              | yes | CCLE |
| FZD1  | -0.4749168  | 0.004   | 0.01732 | TAE684             | ALK                                             | START->HDHD1(deletion)    | KEGG WNT SIGNALING PATHWAY,BIOCARTA WNT PATHWAY,PID WNT SIGNALING PATHWAY                                    | no  | CCLE |
| FZD10 | 0.484523568 | 0.0052  | 0.01569 | GW_441756          | NTRK1                                           | START->STK11(mutation)    | KEGG WNT SIGNALING PATHWAY,PID WNT SIGNALING PATHWAY                                                         | no  | CGP  |
| FZD2  | -0.37107696 | 0.0005  | 0.00268 | AZD6244            | MEK                                             | START->BRAF(mutation)     | KEGG WNT SIGNALING PATHWAY,PID WNT SIGNALING PATHWAY,PID WNT NONCANONICAL PATHWAY                            | no  | CCLE |
| FZD2  | -0.79538237 | 0.0007  | 0.00367 | Lapatinib          | EGFR, HER2                                      | START->ZPBP2(amplication) | KEGG WNT SIGNALING PATHWAY,PID WNT SIGNALING PATHWAY,PID WNT NONCANONICAL PATHWAY                            | no  | CCLE |
| FZD2  | -0.68600112 | 0.0019  | 0.00907 | Lapatinib          | EGFR, HER2                                      | START->ERBB2(amplication) | KEGG WNT SIGNALING PATHWAY,PID WNT SIGNALING PATHWAY,PID WNT NONCANONICAL PATHWAY                            | no  | CCLE |
| FZD2  | -0.64613905 | 0.00505 | 0.02098 | Lapatinib          | EGFR, HER2                                      | START->IKZF3(amplication) | KEGG WNT SIGNALING PATHWAY,PID WNT SIGNALING PATHWAY,PID WNT NONCANONICAL PATHWAY                            | no  | CCLE |
| FZD2  | -0.35726316 | 0.0017  | 0.00822 | PD-0325901         | MEK                                             | START->BRAF(mutation)     | KEGG WNT SIGNALING PATHWAY,PID WNT SIGNALING PATHWAY,PID WNT NONCANONICAL PATHWAY                            | no  | CCLE |
| FZD2  | -0.31199261 | 0.00405 | 0.0175  | PLX4720            | RAF                                             | START->BRAF(mutation)     | KEGG WNT SIGNALING PATHWAY,PID WNT SIGNALING PATHWAY,PID WNT NONCANONICAL PATHWAY                            | no  | CCLE |
| FZD2  | -0.64781975 | 0.0001  | 0.00058 | TAE684             | ALK                                             | START->HDHD1(deletion)    | KEGG WNT SIGNALING PATHWAY,PID WNT SIGNALING PATHWAY,PID WNT NONCANONICAL PATHWAY                            | no  | CCLE |
| FZD2  | -0.79720814 | 0.00465 | 0.01962 | Topotecan          | Topoisomerase I                                 | START->IGLL5(deletion)    | KEGG WNT SIGNALING PATHWAY,PID WNT SIGNALING PATHWAY,PID WNT NONCANONICAL PATHWAY                            | no  | CCLE |
| FZD3  | 0.82058582  | 0.00535 | 0.01601 | ABT-263            | BCL2, BCL-XL, BCL-W                             | START->NOTCH1(mutation)   | KEGG WNT SIGNALING PATHWAY                                                                                   | no  | CGP  |

|         |             |         |         |                    |                                                 |                              |                                                                                                             |     |      |
|---------|-------------|---------|---------|--------------------|-------------------------------------------------|------------------------------|-------------------------------------------------------------------------------------------------------------|-----|------|
| FZD5    | 0.379083408 | 0.00655 | 0.01845 | MK-2206            | AKT1/2                                          | START->PIK3CA(mutation)      | KEGG WNT SIGNALING PATHWAY,PID WNT SIGNALING PATHWAY,PID WNT CANONICAL PATHWAY,PID WNT NONCANONICAL PATHWAY | no  | CGP  |
| FZD5    | 0.360081016 | 0.00495 | 0.01512 | SB590885           | BRAF                                            | START->BRAF(mutation)        | KEGG WNT SIGNALING PATHWAY,PID WNT SIGNALING PATHWAY,PID WNT CANONICAL PATHWAY,PID WNT NONCANONICAL PATHWAY | no  | CGP  |
| FZD6    | -0.75132116 | 0       | 0       | Lapatinib          | EGFR, HER2                                      | START->ZPBP2(amplication)    | KEGG WNT SIGNALING PATHWAY,PID WNT SIGNALING PATHWAY,PID WNT NONCANONICAL PATHWAY                           | no  | CCLE |
| FZD7    | -0.65173703 | 0.00385 | 0.01677 | Topotecan          | Topoisomerase I                                 | START->IGLL5(deletion)       | KEGG WNT SIGNALING PATHWAY,PID WNT SIGNALING PATHWAY,PID WNT NONCANONICAL PATHWAY                           | no  | CCLE |
| GADD45B | 0.535905463 | 0.00305 | 0.01065 | AZ628              | BRAF                                            | START->BRAF(mutation)        | KEGG MAPK SIGNALING PATHWAY,KEGG CELL CYCLE,KEGG P53 SIGNALING PATHWAY                                      | no  | CGP  |
| GADD45B | -0.35877626 | 0.0012  | 0.006   | AZD6244            | MEK                                             | START->BRAF(mutation)        | KEGG MAPK SIGNALING PATHWAY,KEGG CELL CYCLE,KEGG P53 SIGNALING PATHWAY                                      | no  | CCLE |
| GADD45B | -0.3429132  | 0.0024  | 0.01116 | PD-0325901         | MEK                                             | START->BRAF(mutation)        | KEGG MAPK SIGNALING PATHWAY,KEGG CELL CYCLE,KEGG P53 SIGNALING PATHWAY                                      | no  | CCLE |
| GADD45B | 0.353007571 | 0.008   | 0.02117 | SB590885           | BRAF                                            | START->BRAF(mutation)        | KEGG MAPK SIGNALING PATHWAY,KEGG CELL CYCLE,KEGG P53 SIGNALING PATHWAY                                      | no  | CGP  |
| GADD45G | -0.86265254 | 0.00765 | 0.02923 | Irinotecan         | Topoisomerase I                                 | START->TARP(deletion)        | KEGG MAPK SIGNALING PATHWAY,KEGG CELL CYCLE,KEGG P53 SIGNALING PATHWAY                                      | no  | CCLE |
| GADD45G | -0.31039053 | 0.00085 | 0.00438 | PLX4720            | RAF                                             | START->BRAF(mutation)        | KEGG MAPK SIGNALING PATHWAY,KEGG CELL CYCLE,KEGG P53 SIGNALING PATHWAY                                      | no  | CCLE |
| GAS1    | -0.49955395 | 0.0069  | 0.02699 | Lapatinib          | EGFR, HER2                                      | START->ERBB2(amplication)    | KEGG HEDGEHOG SIGNALING PATHWAY                                                                             | no  | CCLE |
| GATA3   | 0.624378186 | 0.00595 | 0.01725 | GDC-0449           | SMO                                             | START->EWS_FLI1(mutation)    | PID NOTCH PATHWAY                                                                                           | no  | CGP  |
| GLI3    | 0.618737235 | 0.00745 | 0.02016 | AZD-2281           | PARP1/2                                         | START->EWS_FLI1(mutation)    | KEGG HEDGEHOG SIGNALING PATHWAY,PID HEDGEHOG GLIPATHWAY                                                     | no  | CGP  |
| GNAI1   | -0.60187535 | 0.0087  | 0.03207 | Lapatinib          | EGFR, HER2                                      | START->ERBB2(amplication)    | PID HEDGEHOG GLIPATHWAY                                                                                     | yes | CCLE |
| GNAI1   | -0.47966238 | 0.00795 | 0.03007 | TAE684             | ALK                                             | START->HDHD1(deletion)       | PID HEDGEHOG GLIPATHWAY                                                                                     | yes | CCLE |
| GNAI1   | 0.562303889 | 0.0099  | 0.02452 | Vorinostat         | HDAC inhibitor Class I, IIa, IIb, IV            | START->EWS_FLI1(mutation)    | PID HEDGEHOG GLIPATHWAY                                                                                     | yes | CGP  |
| GNG12   | 0.433345124 | 0.0014  | 0.00587 | AKT_inhibitor_VIII | AKT1/2                                          | START->PIK3CA(mutation)      | KEGG MAPK SIGNALING PATHWAY                                                                                 | no  | CGP  |
| GNG12   | 0.383126489 | 0.00475 | 0.01468 | MK-2206            | AKT1/2                                          | START->PIK3CA(mutation)      | KEGG MAPK SIGNALING PATHWAY                                                                                 | no  | CGP  |
| GNG12   | 0.33734841  | 0       | 0       | PD-0332991         | CDK4/6                                          | START->CDKN2a(p14)(mutation) | KEGG MAPK SIGNALING PATHWAY                                                                                 | no  | CGP  |
| GNG12   | 0.348746134 | 0.0006  | 0.00297 | Sunitinib          | PDGFRA, PDGFRB, VEGFR(KDR), KIT, FLT3           | START->CDKN2a(p14)(deletion) | KEGG MAPK SIGNALING PATHWAY                                                                                 | no  | CGP  |
| GSN     | 0.634843042 | 0.00785 | 0.0209  | AZD-2281           | PARP1/2                                         | START->EWS_FLI1(mutation)    | REACTOME APOPTOSIS                                                                                          | yes | CGP  |
| GSN     | 0.658670694 | 0.0028  | 0.00998 | GDC-0449           | SMO                                             | START->EWS_FLI1(mutation)    | REACTOME APOPTOSIS                                                                                          | yes | CGP  |
| GSN     | 0.653098558 | 0.00445 | 0.01399 | Vorinostat         | HDAC inhibitor Class I, IIa, IIb, IV            | START->EWS_FLI1(mutation)    | REACTOME APOPTOSIS                                                                                          | yes | CGP  |
| GTSE1   | 0.606130573 | 0.00585 | 0.01705 | GDC-0449           | SMO                                             | START->EWS_FLI1(mutation)    | KEGG P53 SIGNALING PATHWAY                                                                                  | no  | CGP  |
| H1F0    | 0.303830233 | 0.0001  | 0.00061 | CHIR-99021         | GSK3B                                           | START->CDKN2a(p14)(mutation) | REACTOME APOPTOSIS                                                                                          | no  | CGP  |
| H1F0    | -0.47740721 | 0.0016  | 0.00778 | Panobinostat       | HDAC                                            | START->MAP4K4(mutation)      | REACTOME APOPTOSIS                                                                                          | no  | CCLE |
| H1F0    | -0.71945561 | 0.00605 | 0.02427 | ZD-6474            | Abl, EGFR, Flt3, C-KIT, RET, VEGFR-1, KDR, FLT4 | START->NLGN4X(deletion)      | REACTOME APOPTOSIS                                                                                          | no  | CCLE |
| HBEGF   | 0.302055719 | 0.0007  | 0.00338 | Erlotinib          | EGFR                                            | START->CDKN2a(p14)(mutation) | REACTOME PI3K EVENTS IN ERBB4 SIGNALING,REACTOME PI3K EVENTS IN ERBB2 SIGNALING                             | no  | CGP  |
| HDAC4   | 0.706664945 | 0.001   | 0.0045  | GDC-0449           | SMO                                             | START->EWS_FLI1(mutation)    | REACTOME SIGNALING BY NOTCH                                                                                 | yes | CGP  |
| HES1    | 0.670398182 | 0.00375 | 0.01241 | ABT-263            | BCL2, BCL-XL, BCL-W                             | START->NOTCH1(mutation)      | KEGG NOTCH SIGNALING PATHWAY,REACTOME SIGNALING BY NOTCH                                                    | no  | CGP  |
| HEY1    | 0.397120968 | 0.0026  | 0.00943 | AKT_inhibitor_VIII | AKT1/2                                          | START->PIK3CA(mutation)      | REACTOME SIGNALING BY NOTCH                                                                                 | no  | CGP  |
| HEY1    | 0.711935116 | 0.00485 | 0.01491 | ZM-447439          | AURKB                                           | START->NOTCH1(mutation)      | REACTOME SIGNALING BY NOTCH                                                                                 | no  | CGP  |

|          |             |         |         |                    |                                                 |                              |                                 |     |      |
|----------|-------------|---------|---------|--------------------|-------------------------------------------------|------------------------------|---------------------------------|-----|------|
| HIST1H1E | 0.361120086 | 0       | 0       | Erlotinib          | EGFR                                            | START->CDKN2A(mutation)      | REACTOME APOPTOSIS              | no  | CGP  |
| HIST1H1E | 0.326661149 | 0.0003  | 0.00164 | Erlotinib          | EGFR                                            | START->CDKN2a(p14)(mutation) | REACTOME APOPTOSIS              | no  | CGP  |
| HSPA2    | -0.46271886 | 0.0041  | 0.01767 | TAE684             | ALK                                             | START->HDHD1(deletion)       | KEGG MAPK SIGNALING PATHWAY     | no  | CCLE |
| HSPA2    | -0.76522826 | 0.00255 | 0.01177 | ZD-6474            | Abi, EGFR, Flt3, C-KIT, RET, VEGFR-1, KDR, FLT4 | START->NLGN4X(deletion)      | KEGG MAPK SIGNALING PATHWAY     | no  | CCLE |
| ID1      | 0.781346811 | 0.0092  | 0.02331 | ABT-263            | BCL2, BCL-XL, BCL-W                             | START->NOTCH1(mutation)      | KEGG TGF BETA SIGNALING PATHWAY | no  | CGP  |
| ID1      | 0.423269426 | 0.00315 | 0.01091 | AZD6244            | MEK1/2                                          | START->BRAF(mutation)        | KEGG TGF BETA SIGNALING PATHWAY | no  | CGP  |
| ID1      | 0.424883516 | 0.00195 | 0.00756 | MK-2206            | AKT1/2                                          | START->PIK3CA(mutation)      | KEGG TGF BETA SIGNALING PATHWAY | no  | CGP  |
| ID1      | 0.305862797 | 0       | 0       | PLX4720            | BRAF                                            | START->CDKN2A(mutation)      | KEGG TGF BETA SIGNALING PATHWAY | no  | CGP  |
| ID1      | 0.49479113  | 0.0004  | 0.0021  | SB590885           | BRAF                                            | START->BRAF(mutation)        | KEGG TGF BETA SIGNALING PATHWAY | no  | CGP  |
| ID1      | -0.55531993 | 0.00355 | 0.01564 | TAE684             | ALK                                             | START->HDHD1(deletion)       | KEGG TGF BETA SIGNALING PATHWAY | no  | CCLE |
| ID3      | 0.391825468 | 0.00615 | 0.01766 | AZD6244            | MEK1/2                                          | START->BRAF(mutation)        | KEGG TGF BETA SIGNALING PATHWAY | no  | CGP  |
| ID3      | -0.40247216 | 0.00045 | 0.00242 | AZD6244            | MEK                                             | START->BRAF(mutation)        | KEGG TGF BETA SIGNALING PATHWAY | no  | CCLE |
| ID3      | 0.434314817 | 0.0018  | 0.0071  | MK-2206            | AKT1/2                                          | START->PIK3CA(mutation)      | KEGG TGF BETA SIGNALING PATHWAY | no  | CGP  |
| ID3      | -0.54444992 | 0.0004  | 0.00217 | Panobinostat       | HDAC                                            | START->MAP4K4(mutation)      | KEGG TGF BETA SIGNALING PATHWAY | no  | CCLE |
| ID3      | -0.37537769 | 0.0011  | 0.00555 | PD-0325901         | MEK                                             | START->BRAF(mutation)        | KEGG TGF BETA SIGNALING PATHWAY | no  | CCLE |
| ID3      | -0.4220406  | 0.00035 | 0.00192 | PLX4720            | RAF                                             | START->BRAF(mutation)        | KEGG TGF BETA SIGNALING PATHWAY | no  | CCLE |
| ID3      | -0.37179599 | 0.00275 | 0.01257 | RAF265             | Raf kinase B, KDR                               | START->BRAF(mutation)        | KEGG TGF BETA SIGNALING PATHWAY | no  | CCLE |
| ID3      | -0.86077491 | 0.0012  | 0.006   | Topotecan          | Topoisomerase I                                 | START->IGLL5(deletion)       | KEGG TGF BETA SIGNALING PATHWAY | no  | CCLE |
| ID4      | -0.43620134 | 0.0061  | 0.02444 | TAE684             | ALK                                             | START->HDHD1(deletion)       | KEGG TGF BETA SIGNALING PATHWAY | no  | CCLE |
| IFNE     | -0.38775617 | 0.0012  | 0.006   | LBW242             | IAP                                             | START->SOX10(mutation)       | KEGG JAK STAT SIGNALING PATHWAY | no  | CCLE |
| IFNE     | -0.31359621 | 0.0047  | 0.01979 | Panobinostat       | HDAC                                            | START->BRD2(mutation)        | KEGG JAK STAT SIGNALING PATHWAY | no  | CCLE |
| IFNGR1   | 0.369363094 | 0.00685 | 0.01904 | MK-2206            | AKT1/2                                          | START->PIK3CA(mutation)      | KEGG JAK STAT SIGNALING PATHWAY | yes | CGP  |
| IGFBP4   | 0.357675218 | 0.0077  | 0.02061 | SB590885           | BRAF                                            | START->BRAF(mutation)        | PID WNT SIGNALING PATHWAY       | no  | CGP  |
| IL13RA1  | -0.50908888 | 0.00735 | 0.02835 | TAE684             | ALK                                             | START->HDHD1(deletion)       | KEGG JAK STAT SIGNALING PATHWAY | no  | CCLE |
| IL13RA2  | 0.620580414 | 0.00175 | 0.00694 | ZM-447439          | AURKB                                           | START->NOTCH1(mutation)      | KEGG JAK STAT SIGNALING PATHWAY | no  | CGP  |
| IL15     | 0.438840445 | 0.001   | 0.0045  | AKT_inhibitor_VIII | AKT1/2                                          | START->PIK3CA(mutation)      | KEGG JAK STAT SIGNALING PATHWAY | no  | CGP  |
| IL15     | 0.474658087 | 0.0092  | 0.02331 | GW_441756          | NTRK1                                           | START->STK11(mutation)       | KEGG JAK STAT SIGNALING PATHWAY | no  | CGP  |
| IL15     | -0.64790094 | 0.0085  | 0.03154 | Lapatinib          | EGFR, HER2                                      | START->ZPBP2(amplication)    | KEGG JAK STAT SIGNALING PATHWAY | no  | CCLE |
| IL15     | 0.431904941 | 0.00125 | 0.00537 | MK-2206            | AKT1/2                                          | START->PIK3CA(mutation)      | KEGG JAK STAT SIGNALING PATHWAY | no  | CGP  |
| IL15     | 0.396779441 | 0.00185 | 0.00725 | SB590885           | BRAF                                            | START->BRAF(mutation)        | KEGG JAK STAT SIGNALING PATHWAY | no  | CGP  |
| IL15RA   | -0.32649039 | 0.00255 | 0.01177 | PD-0325901         | MEK                                             | START->BRAF(mutation)        | KEGG JAK STAT SIGNALING PATHWAY | no  | CCLE |
| IL15RA   | 0.49102271  | 0.001   | 0.0045  | PLX4720            | BRAF                                            | START->BRAF(mutation)        | KEGG JAK STAT SIGNALING PATHWAY | no  | CGP  |
| IL15RA   | -0.39532954 | 0.0002  | 0.00113 | PLX4720            | RAF                                             | START->BRAF(mutation)        | KEGG JAK STAT SIGNALING PATHWAY | no  | CCLE |
| IL15RA   | 0.576332746 | 0.00005 | 0.00032 | SB590885           | BRAF                                            | START->BRAF(mutation)        | KEGG JAK STAT SIGNALING PATHWAY | no  | CGP  |



|        |             |         |         |                    |                                                 |                              |                                                    |     |      |
|--------|-------------|---------|---------|--------------------|-------------------------------------------------|------------------------------|----------------------------------------------------|-----|------|
| IL1A   | 0.338420469 | 0.0088  | 0.02263 | AKT_inhibitor_VIII | AKT1/2                                          | START->PIK3CA(mutation)      | KEGG APOPTOSIS,KEGG MAPK SIGNALING PATHWAY         | no  | CGP  |
| IL1R1  | -0.63580099 | 0.0049  | 0.02047 | Panobinostat       | HDAC                                            | START->RARA(mutation)        | KEGG APOPTOSIS,KEGG MAPK SIGNALING PATHWAY         | yes | CCLE |
| IL1R1  | -0.3962955  | 0.00045 | 0.00242 | Panobinostat       | HDAC                                            | START->BRD2(mutation)        | KEGG APOPTOSIS,KEGG MAPK SIGNALING PATHWAY         | yes | CCLE |
| IL1R1  | -0.31528923 | 0.00365 | 0.01603 | PD-0325901         | MEK                                             | START->BRAF(mutation)        | KEGG APOPTOSIS,KEGG MAPK SIGNALING PATHWAY         | yes | CCLE |
| IL1R1  | -0.71245147 | 0.008   | 0.03021 | ZD-6474            | Abi, EGFR, Flt3, C-KIT, RET, VEGFR-1, KDR, FLT4 | START->NLGN4X(deletion)      | KEGG APOPTOSIS,KEGG MAPK SIGNALING PATHWAY         | yes | CCLE |
| IL1R2  | 0.376367761 | 0.0097  | 0.02419 | AZD6244            | MEK1/2                                          | START->BRAF(mutation)        | KEGG MAPK SIGNALING PATHWAY                        | no  | CGP  |
| IL1R2  | 0.517114437 | 0.0015  | 0.00618 | CI-1040            | MEK1/2                                          | START->BRAF(mutation)        | KEGG MAPK SIGNALING PATHWAY                        | no  | CGP  |
| IL1R2  | -0.67008946 | 0.0067  | 0.02637 | Lapatinib          | EGFR, HER2                                      | START->ZBP2(amplication)     | KEGG MAPK SIGNALING PATHWAY                        | no  | CCLE |
| IL1RAP | 0.612206664 | 0.00575 | 0.01683 | GDC-0449           | SMO                                             | START->EWS_FLI1(mutation)    | KEGG APOPTOSIS                                     | no  | CGP  |
| IL20RB | -0.8086213  | 0.00945 | 0.03411 | Panobinostat       | HDAC                                            | START->IGLL5(deletion)       | KEGG JAK STAT SIGNALING PATHWAY                    | no  | CCLE |
| IL20RB | -0.39575522 | 0.0004  | 0.00217 | Panobinostat       | HDAC                                            | START->BRD2(mutation)        | KEGG JAK STAT SIGNALING PATHWAY                    | no  | CCLE |
| IL23A  | -0.66225088 | 0.00645 | 0.02556 | Lapatinib          | EGFR, HER2                                      | START->ZBP2(amplication)     | KEGG JAK STAT SIGNALING PATHWAY                    | no  | CCLE |
| IL24   | 0.343148425 | 0.00815 | 0.02145 | AKT_inhibitor_VIII | AKT1/2                                          | START->PIK3CA(mutation)      | KEGG JAK STAT SIGNALING PATHWAY                    | no  | CGP  |
| IL24   | 0.70584206  | 0.0013  | 0.00554 | GDC-0449           | SMO                                             | START->EWS_FLI1(mutation)    | KEGG JAK STAT SIGNALING PATHWAY                    | no  | CGP  |
| IL2RG  | 0.322945515 | 0.0006  | 0.00297 | BMS-536924         | IGF1R                                           | START->CDKN2A(mutation)      | KEGG JAK STAT SIGNALING PATHWAY                    | yes | CGP  |
| IL4R   | 0.496790967 | 0.00995 | 0.02461 | AZ628              | BRAF                                            | START->BRAF(mutation)        | KEGG JAK STAT SIGNALING PATHWAY                    | no  | CGP  |
| IL4R   | 0.500528953 | 0.00035 | 0.00188 | AZD6244            | MEK1/2                                          | START->BRAF(mutation)        | KEGG JAK STAT SIGNALING PATHWAY                    | no  | CGP  |
| IL4R   | 0.437816601 | 0.0053  | 0.0159  | CI-1040            | MEK1/2                                          | START->BRAF(mutation)        | KEGG JAK STAT SIGNALING PATHWAY                    | no  | CGP  |
| IL4R   | 0.430381588 | 0.00325 | 0.01117 | PLX4720            | BRAF                                            | START->BRAF(mutation)        | KEGG JAK STAT SIGNALING PATHWAY                    | no  | CGP  |
| IL4R   | 0.543597225 | 0       | 0       | SB590885           | BRAF                                            | START->BRAF(mutation)        | KEGG JAK STAT SIGNALING PATHWAY                    | no  | CGP  |
| IL7R   | 0.312791907 | 0.001   | 0.0045  | MG-132             | Proteasome                                      | START->CDKN2A(mutation)      | KEGG JAK STAT SIGNALING PATHWAY                    | no  | CGP  |
| IL7R   | 0.378227168 | 0.0049  | 0.01502 | RDEA119            | MEK1/2                                          | START->BRAF(mutation)        | KEGG JAK STAT SIGNALING PATHWAY                    | no  | CGP  |
| INHBA  | -0.34129712 | 0.00275 | 0.01257 | Panobinostat       | HDAC                                            | START->BRD2(mutation)        | KEGG TGF BETA SIGNALING PATHWAY                    | no  | CCLE |
| INHBB  | 0.527830317 | 0.0072  | 0.01971 | GW_441756          | NTRK1                                           | START->STK11(mutation)       | KEGG TGF BETA SIGNALING PATHWAY                    | no  | CGP  |
| INHBB  | -0.34275707 | 0.0029  | 0.01316 | Panobinostat       | HDAC                                            | START->BRD2(mutation)        | KEGG TGF BETA SIGNALING PATHWAY                    | no  | CCLE |
| IQGAP2 | 0.412010781 | 0.00465 | 0.01445 | AZD6244            | MEK1/2                                          | START->BRAF(mutation)        | MIPS TNF ALPHA NF KAPPA B SIGNALING COMPLEX 5      | no  | CGP  |
| IRF9   | 0.515163809 | 0.00705 | 0.01943 | AZ628              | BRAF                                            | START->BRAF(mutation)        | KEGG JAK STAT SIGNALING PATHWAY                    | no  | CGP  |
| IRF9   | 0.419588266 | 0.00165 | 0.00662 | RDEA119            | MEK1/2                                          | START->BRAF(mutation)        | KEGG JAK STAT SIGNALING PATHWAY                    | no  | CGP  |
| IRS1   | 0.408908704 | 0.00405 | 0.0131  | AZD6244            | MEK1/2                                          | START->BRAF(mutation)        | REACTOME PI3K CASCADE,REACTOME PI3K AKT ACTIVATION | yes | CGP  |
| IRS1   | 0.438166109 | 0.0022  | 0.0083  | PLX4720            | BRAF                                            | START->BRAF(mutation)        | REACTOME PI3K CASCADE,REACTOME PI3K AKT ACTIVATION | yes | CGP  |
| IRS1   | 0.34900137  | 0.00895 | 0.02289 | RDEA119            | MEK1/2                                          | START->BRAF(mutation)        | REACTOME PI3K CASCADE,REACTOME PI3K AKT ACTIVATION | yes | CGP  |
| IRS1   | 0.541118118 | 0.0001  | 0.00061 | SB590885           | BRAF                                            | START->BRAF(mutation)        | REACTOME PI3K CASCADE,REACTOME PI3K AKT ACTIVATION | yes | CGP  |
| IRS1   | 0.309346318 | 0.0017  | 0.00678 | Sunitinib          | PDGFRA, PDGFRB, VEGFR(KDR), KIT, FLT3           | START->CDKN2a(p14)(deletion) | REACTOME PI3K CASCADE,REACTOME PI3K AKT ACTIVATION | yes | CGP  |

|         |             |         |         |              |                                                 |                              |                                                                                                                                                              |     |      |
|---------|-------------|---------|---------|--------------|-------------------------------------------------|------------------------------|--------------------------------------------------------------------------------------------------------------------------------------------------------------|-----|------|
| IRS2    | -0.7832832  | 0.00095 | 0.00485 | Lapatinib    | EGFR, HER2                                      | START->ZBP2(amplication)     | REACTOME PI3K CASCADE,REACTOME PI3K AKT ACTIVATION                                                                                                           | no  | CCLE |
| IRS2    | -0.78125597 | 0.0007  | 0.00367 | Lapatinib    | EGFR, HER2                                      | START->IKZF3(amplication)    | REACTOME PI3K CASCADE,REACTOME PI3K AKT ACTIVATION                                                                                                           | no  | CCLE |
| IRS2    | -0.68697592 | 0.00225 | 0.01054 | Lapatinib    | EGFR, HER2                                      | START->ERBB2(amplication)    | REACTOME PI3K CASCADE,REACTOME PI3K AKT ACTIVATION                                                                                                           | no  | CCLE |
| IRS2    | -0.79075695 | 0.0041  | 0.01767 | Panobinostat | HDAC                                            | START->IGLL5(deletion)       | REACTOME PI3K CASCADE,REACTOME PI3K AKT ACTIVATION                                                                                                           | no  | CCLE |
| JAG2    | 0.801526587 | 0.00915 | 0.02324 | ABT-263      | BCL2, BCL-XL, BCL-W                             | START->NOTCH1(mutation)      | PID NOTCH PATHWAY,KEGG NOTCH SIGNALING PATHWAY,REACTOME SIGNALING BY NOTCH                                                                                   | no  | CGP  |
| JAG2    | -0.32963776 | 0.00165 | 0.008   | PLX4720      | RAF                                             | START->BRAF(mutation)        | PID NOTCH PATHWAY,KEGG NOTCH SIGNALING PATHWAY,REACTOME SIGNALING BY NOTCH                                                                                   | no  | CCLE |
| JUN     | 0.371510546 | 0.00575 | 0.01683 | SB590885     | BRAF                                            | START->BRAF(mutation)        | KEGG WNT SIGNALING PATHWAY,REACTOME SIGNALING BY NOTCH,KEGG MAPK SIGNALING PATHWAY,BIOCARTA MAPK PATHWAY                                                     | yes | CGP  |
| JUN     | 0.324970935 | 0.0023  | 0.0086  | VX-680       | Aurora A/B/C, FLT3, ABL1, JAK2,                 | START->CDKN2a(p14)(deletion) | KEGG WNT SIGNALING PATHWAY,REACTOME SIGNALING BY NOTCH,KEGG MAPK SIGNALING PATHWAY,BIOCARTA MAPK PATHWAY                                                     | yes | CGP  |
| LCK     | 0.350411906 | 0.0002  | 0.00114 | BMS-536924   | IGF1R                                           | START->CDKN2A(mutation)      | PID NFKAPPATYPICALPATHWAY                                                                                                                                    | yes | CGP  |
| LEF1    | 0.323035514 | 0.00035 | 0.00188 | AZD-0530     | SRC, ABL1                                       | START->CDKN2A(mutation)      | KEGG WNT SIGNALING PATHWAY,BIOCARTA WNT PATHWAY                                                                                                              | no  | CGP  |
| LEF1    | 0.36504929  | 0.00015 | 0.00089 | BMS-536924   | IGF1R                                           | START->CDKN2A(mutation)      | KEGG WNT SIGNALING PATHWAY,BIOCARTA WNT PATHWAY                                                                                                              | no  | CGP  |
| LGALS3  | 0.619885198 | 0.00525 | 0.01579 | GDC-0449     | SMO                                             | START->EWS_FLI1(mutation)    | PID HEDGEHOG GLIPATHWAY                                                                                                                                      | yes | CGP  |
| LGALS3  | 0.343116364 | 0       | 0       | PD-0332991   | CDK4/6                                          | START->CDKN2a(p14)(mutation) | PID HEDGEHOG GLIPATHWAY                                                                                                                                      | yes | CGP  |
| LIFR    | -0.3453042  | 0.00255 | 0.01177 | Panobinostat | HDAC                                            | START->BRD2(mutation)        | KEGG JAK STAT SIGNALING PATHWAY                                                                                                                              | no  | CCLE |
| LMNA    | 0.309720317 | 0.00005 | 0.00032 | PD-0332991   | CDK4/6                                          | START->CDKN2a(p14)(mutation) | REACTOME APOPTOSIS                                                                                                                                           | no  | CGP  |
| LMNB1   | 0.300703813 | 0.00135 | 0.0057  | MG-132       | Proteasome                                      | START->CDKN2A(mutation)      | REACTOME APOPTOSIS                                                                                                                                           | no  | CGP  |
| LRP5    | -0.31595943 | 0.00665 | 0.02621 | Panobinostat | HDAC                                            | START->BRD2(mutation)        | KEGG WNT SIGNALING PATHWAY,PID WNT SIGNALING PATHWAY                                                                                                         | no  | CCLE |
| MAGED1  | 0.582042168 | 0       | 0       | Sunitinib    | PDGFRA, PDGFRB, VEGFR(KDR), KIT, FLT3           | START->CDKN2a(p14)(deletion) | REACTOME REGULATION OF APOPTOSIS,REACTOME APOPTOSIS                                                                                                          | no  | CGP  |
| MAGED1  | 0.302672206 | 0.0037  | 0.01229 | VX-680       | Aurora A/B/C, FLT3, ABL1, JAK2,                 | START->CDKN2a(p14)(deletion) | REACTOME REGULATION OF APOPTOSIS,REACTOME APOPTOSIS                                                                                                          | no  | CGP  |
| MAP2K6  | 0.695059257 | 0.00405 | 0.0131  | AZD-2281     | PARP1/2                                         | START->EWS_FLI1(mutation)    | KEGG MAPK SIGNALING PATHWAY,BIOCARTA MAPK PATHWAY                                                                                                            | no  | CGP  |
| MAP2K6  | 0.35483986  | 0.00005 | 0.00032 | Dasatinib    | ABL, SRC, KIT, PDGFR                            | START->CDKN2a(p14)(mutation) | KEGG MAPK SIGNALING PATHWAY,BIOCARTA MAPK PATHWAY                                                                                                            | no  | CGP  |
| MAP2K6  | 0.642883086 | 0.0041  | 0.01321 | GDC-0449     | SMO                                             | START->EWS_FLI1(mutation)    | KEGG MAPK SIGNALING PATHWAY,BIOCARTA MAPK PATHWAY                                                                                                            | no  | CGP  |
| MAP2K6  | -0.76323315 | 0.005   | 0.02081 | ZD-6474      | Abi, EGFR, Flt3, C-KIT, RET, VEGFR-1, KDR, FLT4 | START->NLGN4X(deletion)      | KEGG MAPK SIGNALING PATHWAY,BIOCARTA MAPK PATHWAY                                                                                                            | no  | CCLE |
| MAP3K14 | -0.45689166 | 0       | 0       | AZD6244      | MEK                                             | START->BRAF(mutation)        | KEGG APOPTOSIS,KEGG MAPK SIGNALING PATHWAY,BIOCARTA MAPK PATHWAY,MIPS TNF ALPHA NF KAPPA B SIGNALING COMPLEX 1,MIPS TNF ALPHA NF KAPPA B SIGNALING COMPLEX 6 | no  | CCLE |
| MAP3K14 | -0.80221707 | 0.0008  | 0.00415 | Lapatinib    | EGFR, HER2                                      | START->ZBP2(amplication)     | KEGG APOPTOSIS,KEGG MAPK SIGNALING PATHWAY,BIOCARTA MAPK PATHWAY,MIPS TNF ALPHA NF KAPPA B SIGNALING COMPLEX 1,MIPS TNF ALPHA NF KAPPA B SIGNALING COMPLEX 6 | no  | CCLE |
| MAP3K14 | -0.47129208 | 0.00005 | 0.00029 | PD-0325901   | MEK                                             | START->BRAF(mutation)        | KEGG APOPTOSIS,KEGG MAPK SIGNALING PATHWAY,BIOCARTA MAPK PATHWAY,MIPS TNF ALPHA NF KAPPA B SIGNALING COMPLEX 1,MIPS TNF ALPHA NF KAPPA B SIGNALING COMPLEX 6 | no  | CCLE |
| MAP3K14 | -0.36107687 | 0.00075 | 0.00391 | PLX4720      | RAF                                             | START->BRAF(mutation)        | KEGG APOPTOSIS,KEGG MAPK SIGNALING PATHWAY,BIOCARTA MAPK PATHWAY,MIPS TNF ALPHA NF KAPPA B SIGNALING COMPLEX 1,MIPS TNF ALPHA NF KAPPA B SIGNALING COMPLEX 6 | no  | CCLE |
| MAP3K5  | 0.508223293 | 0.00845 | 0.02196 | AZ628        | BRAF                                            | START->BRAF(mutation)        | KEGG MAPK SIGNALING PATHWAY,BIOCARTA MAPK PATHWAY                                                                                                            | no  | CGP  |
| MAP3K5  | 0.378637266 | 0.0045  | 0.0141  | RDEA119      | MEK1/2                                          | START->BRAF(mutation)        | KEGG MAPK SIGNALING PATHWAY,BIOCARTA MAPK PATHWAY                                                                                                            | no  | CGP  |

|        |             |         |                            |                                       |                              |                                                                                                                                                                   |     |      |
|--------|-------------|---------|----------------------------|---------------------------------------|------------------------------|-------------------------------------------------------------------------------------------------------------------------------------------------------------------|-----|------|
| MAP3K5 | 0.476111038 | 0.0006  | 0.00297 SB590885           | BRAF                                  | START->BRAF(mutation)        | KEGG MAPK SIGNALING PATHWAY,BIOCARTA MAPK PATHWAY                                                                                                                 | no  | CGP  |
| MAP3K8 | -0.37071166 | 0.0004  | 0.00217 PLX4720            | RAF                                   | START->BRAF(mutation)        | KEGG MAPK SIGNALING PATHWAY,BIOCARTA MAPK PATHWAY,MIPS TNF ALPHA NF KAPPA B SIGNALING COMPLEX 3                                                                   | no  | CCLE |
| MAP3K8 | 0.375120725 | 0.00605 | 0.01746 RDEA119            | MEK1/2                                | START->BRAF(mutation)        | KEGG MAPK SIGNALING PATHWAY,BIOCARTA MAPK PATHWAY,MIPS TNF ALPHA NF KAPPA B SIGNALING COMPLEX 3                                                                   | no  | CGP  |
| MAP4K1 | 0.607515108 | 0.0067  | 0.01874 GDC-0449           | SMO                                   | START->EWS_FLI1(mutation)    | KEGG MAPK SIGNALING PATHWAY,BIOCARTA MAPK PATHWAY                                                                                                                 | no  | CGP  |
| MAP4K1 | 0.394969689 | 0       | 0 MG-132                   | Proteasome                            | START->CDKN2A(mutation)      | KEGG MAPK SIGNALING PATHWAY,BIOCARTA MAPK PATHWAY                                                                                                                 | no  | CGP  |
| MAPT   | -0.78646228 | 0.00895 | 0.03273 Topotecan          | Topoisomerase I                       | START->IGLL5(deletion)       | REACTOME APOPTOSIS,KEGG MAPK SIGNALING PATHWAY                                                                                                                    | no  | CCLE |
| MECOM  | -0.81364411 | 0.0006  | 0.00317 Panobinostat       | HDAC                                  | START->RARA(mutation)        | KEGG MAPK SIGNALING PATHWAY                                                                                                                                       | no  | CCLE |
| MECOM  | 0.422905272 | 0.00375 | 0.01241 PLX4720            | BRAF                                  | START->BRAF(mutation)        | KEGG MAPK SIGNALING PATHWAY                                                                                                                                       | no  | CGP  |
| MECOM  | -0.30927476 | 0.0038  | 0.01659 PLX4720            | RAF                                   | START->BRAF(mutation)        | KEGG MAPK SIGNALING PATHWAY                                                                                                                                       | no  | CCLE |
| MECOM  | 0.398110285 | 0.0044  | 0.01388 SB590885           | BRAF                                  | START->BRAF(mutation)        | KEGG MAPK SIGNALING PATHWAY                                                                                                                                       | no  | CGP  |
| MFAP5  | -0.62117071 | 0.0036  | 0.01584 Lapatinib          | EGFR, HER2                            | START->ZPBP2(amplication)    | PID NOTCH PATHWAY                                                                                                                                                 | no  | CCLE |
| MGMT   | -0.34431661 | 0.0018  | 0.00865 PLX4720            | RAF                                   | START->BRAF(mutation)        | REACTOME DNA REPAIR                                                                                                                                               | yes | CCLE |
| NEDD4L | 0.319408802 | 0.0007  | 0.00338 PF-02341066        | MET, ALK                              | START->CDKN2a(p14)(deletion) | PID TGFBRPATHWAY                                                                                                                                                  | no  | CGP  |
| NEDD4L | 0.311534307 | 0.00125 | 0.00537 Sunitinib          | PDGFRA, PDGFRB, VEGFR(KDR), KIT, FLT3 | START->CDKN2a(p14)(deletion) | PID TGFBRPATHWAY                                                                                                                                                  | no  | CGP  |
| NEDD4L | 0.829387325 | 0.0014  | 0.00587 ZM-447439          | AURKB                                 | START->NOTCH1(mutation)      | PID TGFBRPATHWAY                                                                                                                                                  | no  | CGP  |
| NFKBIE | 0.360580678 | 0.0065  | 0.01836 AKT_inhibitor_VIII | AKT1/2                                | START->PIK3CA(mutation)      | MIPS TNF ALPHA NF KAPPA B SIGNALING COMPLEX                                                                                                                       | no  | CGP  |
| NGF    | -0.84226268 | 0.0086  | 0.03181 Topotecan          | Topoisomerase I                       | START->NCRNA00226(deletion)  | KEGG APOPTOSIS,REACTOME PI3K AKT ACTIVATION,REACTOME SIGNALLING TO RAS,KEGG MAPK SIGNALING PATHWAY                                                                | yes | CCLE |
| NQO1   | 0.373443931 | 0       | 0 PD-0332991               | CDK4/6                                | START->CDKN2a(p14)(mutation) | BIOCARTA P53HYPOXIA PATHWAY                                                                                                                                       | yes | CGP  |
| NRG1   | -0.3040081  | 0.00495 | 0.02064 PD-0325901         | MEK                                   | START->BRAF(mutation)        | REACTOME PI3K EVENTS IN ERBB4 SIGNALING,REACTOME PI3K EVENTS IN ERBB2 SIGNALING                                                                                   | no  | CCLE |
| NRG1   | -0.45074377 | 0.0026  | 0.01197 TAE684             | ALK                                   | START->HDHD1(deletion)       | REACTOME PI3K EVENTS IN ERBB4 SIGNALING,REACTOME PI3K EVENTS IN ERBB2 SIGNALING                                                                                   | no  | CCLE |
| NTF3   | -0.30145126 | 0.0027  | 0.01237 AZD6244            | MEK                                   | START->BRAF(mutation)        | KEGG MAPK SIGNALING PATHWAY                                                                                                                                       | no  | CCLE |
| OSMR   | 0.660767863 | 0.00505 | 0.01535 AZD-2281           | PARP1/2                               | START->EWS_FLI1(mutation)    | KEGG JAK STAT SIGNALING PATHWAY                                                                                                                                   | no  | CGP  |
| OSMR   | 0.64194463  | 0.00255 | 0.0093 GDC-0449            | SMO                                   | START->EWS_FLI1(mutation)    | KEGG JAK STAT SIGNALING PATHWAY                                                                                                                                   | no  | CGP  |
| OSMR   | -0.66650232 | 0.0079  | 0.02993 Lapatinib          | EGFR, HER2                            | START->ZPBP2(amplication)    | KEGG JAK STAT SIGNALING PATHWAY                                                                                                                                   | no  | CCLE |
| OSMR   | -0.63535095 | 0.00585 | 0.02363 Lapatinib          | EGFR, HER2                            | START->IKZF3(amplication)    | KEGG JAK STAT SIGNALING PATHWAY                                                                                                                                   | no  | CCLE |
| PDGFA  | 0.347956886 | 0.0092  | 0.02331 AKT_inhibitor_VIII | AKT1/2                                | START->PIK3CA(mutation)      | KEGG MAPK SIGNALING PATHWAY                                                                                                                                       | no  | CGP  |
| PDGFRA | -0.57462953 | 0.0039  | 0.01696 Lapatinib          | EGFR, HER2                            | START->IKZF3(amplication)    | KEGG MAPK SIGNALING PATHWAY                                                                                                                                       | yes | CCLE |
| PDGFRA | -0.52917434 | 0.0024  | 0.01116 Lapatinib          | EGFR, HER2                            | START->ERBB2(amplication)    | KEGG MAPK SIGNALING PATHWAY                                                                                                                                       | yes | CCLE |
| PERP   | 0.300012537 | 0.00005 | 0.00032 PD-0332991         | CDK4/6                                | START->CDKN2a(p14)(mutation) | KEGG P53 SIGNALING PATHWAY                                                                                                                                        | no  | CGP  |
| PHLPP1 | 0.431550824 | 0.00185 | 0.00725 MK-2206            | AKT1/2                                | START->PIK3CA(mutation)      | REACTOME PI3K EVENTS IN ERBB4 SIGNALING,REACTOME PI3K EVENTS IN ERBB2 SIGNALING,REACTOME NEGATIVE REGULATION OF THE PI3K AKT NETWORK,REACTOME PI3K AKT ACTIVATION | no  | CGP  |
| PIK3CG | -0.60694143 | 0.00775 | 0.0295 Lapatinib           | EGFR, HER2                            | START->IKZF3(amplication)    | KEGG JAK STAT SIGNALING PATHWAY,KEGG APOPTOSIS,BIOCARTA RAS PATHWAY                                                                                               | yes | CCLE |

|          |             |         |                      |                                                 |                              |                                                                                                                                                             |     |      |
|----------|-------------|---------|----------------------|-------------------------------------------------|------------------------------|-------------------------------------------------------------------------------------------------------------------------------------------------------------|-----|------|
| PIK3R3   | 0.342967787 | 0.00025 | 0.0014 BMS-536924    | IGF1R                                           | START->CDKN2A(mutation)      | KEGG JAK STAT SIGNALING PATHWAY,KEGG APOPTOSIS                                                                                                              | yes | CGP  |
| PIK3R3   | 0.352306797 | 0.0001  | 0.00061 Dasatinib    | ABL, SRC, KIT, PDGFR                            | START->CDKN2a(p14)(mutation) | KEGG JAK STAT SIGNALING PATHWAY,KEGG APOPTOSIS                                                                                                              | yes | CGP  |
| PIM1     | 0.515197853 | 0.00795 | 0.0211 AZ628         | BRAF                                            | START->BRAF(mutation)        | KEGG JAK STAT SIGNALING PATHWAY                                                                                                                             | yes | CGP  |
| PIM1     | 0.468046422 | 0.00065 | 0.00318 MK-2206      | AKT1/2                                          | START->PIK3CA(mutation)      | KEGG JAK STAT SIGNALING PATHWAY                                                                                                                             | yes | CGP  |
| PIM1     | 0.376247059 | 0.00815 | 0.02145 PLX4720      | BRAF                                            | START->BRAF(mutation)        | KEGG JAK STAT SIGNALING PATHWAY                                                                                                                             | yes | CGP  |
| PIM1     | -0.30850487 | 0.0038  | 0.01659 PLX4720      | RAF                                             | START->BRAF(mutation)        | KEGG JAK STAT SIGNALING PATHWAY                                                                                                                             | yes | CCLE |
| PIM1     | 0.52760033  | 0.00015 | 0.00089 SB590885     | BRAF                                            | START->BRAF(mutation)        | KEGG JAK STAT SIGNALING PATHWAY                                                                                                                             | yes | CGP  |
| PITX2    | -0.3480796  | 0.0011  | 0.00555 RAF265       | Raf kinase B, KDR                               | START->BRAF(mutation)        | KEGG TGF BETA SIGNALING PATHWAY                                                                                                                             | no  | CCLE |
| PLA2G10  | -0.32249331 | 0.0017  | 0.00822 RAF265       | Raf kinase B, KDR                               | START->BRAF(mutation)        | KEGG MAPK SIGNALING PATHWAY                                                                                                                                 | no  | CCLE |
| PLA2G2A  | -0.79355722 | 0.0046  | 0.01945 ZD-6474      | Abl, EGFR, Flt3, C-KIT, RET, VEGFR-1, KDR, FLT4 | START->NLGN4X(deletion)      | KEGG MAPK SIGNALING PATHWAY                                                                                                                                 | yes | CCLE |
| PLCB4    | -0.68948487 | 0.00615 | 0.0246 Panobinostat  | HDAC                                            | START->RARA(mutation)        | KEGG WNT SIGNALING PATHWAY                                                                                                                                  | no  | CCLE |
| PLCB4    | -0.65156133 | 0       | 0 TAE684             | ALK                                             | START->HDHD1(deletion)       | KEGG WNT SIGNALING PATHWAY                                                                                                                                  | no  | CCLE |
| PMEPA1   | 0.303679259 | 0.0011  | 0.00486 Sunitinib    | PDGFRA, PDGFRB, VEGFR(KDR), KIT, FLT3           | START->CDKN2a(p14)(deletion) | REACTOME DOWNREGULATION OF TGF BETA RECEPTOR SIGNALING,REACTOME TGF BETA RECEPTOR SIGNALING ACTIVATES SMADS,REACTOME SIGNALING BY TGF BETA RECEPTOR COMPLEX | no  | CGP  |
| PPARG    | 0.586850752 | 0.00005 | 0.00032 MK-2206      | AKT1/2                                          | START->PIK3CA(mutation)      | PID WNT NONCANONICAL PATHWAY                                                                                                                                | yes | CGP  |
| PPARG    | -0.33034302 | 0.0049  | 0.02047 Panobinostat | HDAC                                            | START->BRD2(mutation)        | PID WNT NONCANONICAL PATHWAY                                                                                                                                | yes | CCLE |
| PPP1R13L | 0.601037678 | 0.00145 | 0.00602 AZ628        | BRAF                                            | START->BRAF(mutation)        | PID P53REGULATIONPATHWAY                                                                                                                                    | no  | CGP  |
| PPP1R13L | -0.31257914 | 0.00445 | 0.01892 AZD6244      | MEK                                             | START->BRAF(mutation)        | PID P53REGULATIONPATHWAY                                                                                                                                    | no  | CCLE |
| PPP1R13L | -0.48357305 | 0.0011  | 0.00555 Panobinostat | HDAC                                            | START->MAP4K4(mutation)      | PID P53REGULATIONPATHWAY                                                                                                                                    | no  | CCLE |
| PPP1R13L | -0.33436238 | 0.0027  | 0.01237 PD-0325901   | MEK                                             | START->BRAF(mutation)        | PID P53REGULATIONPATHWAY                                                                                                                                    | no  | CCLE |
| PPP1R13L | 0.40726832  | 0.0059  | 0.01714 PLX4720      | BRAF                                            | START->BRAF(mutation)        | PID P53REGULATIONPATHWAY                                                                                                                                    | no  | CGP  |
| PPP1R13L | -0.40810765 | 0.00035 | 0.00192 PLX4720      | RAF                                             | START->BRAF(mutation)        | PID P53REGULATIONPATHWAY                                                                                                                                    | no  | CCLE |
| PPP1R13L | 0.453190177 | 0.0006  | 0.00297 SB590885     | BRAF                                            | START->BRAF(mutation)        | PID P53REGULATIONPATHWAY                                                                                                                                    | no  | CGP  |
| PRKAA2   | 0.440293743 | 0.00185 | 0.00725 AZD6244      | MEK1/2                                          | START->BRAF(mutation)        | REACTOME PI3K CASCADE                                                                                                                                       | no  | CGP  |
| PRKAA2   | -0.31589008 | 0.00355 | 0.01564 AZD6244      | MEK                                             | START->BRAF(mutation)        | REACTOME PI3K CASCADE                                                                                                                                       | no  | CCLE |
| PRKAA2   | 0.433851297 | 0.00725 | 0.01981 CI-1040      | MEK1/2                                          | START->BRAF(mutation)        | REACTOME PI3K CASCADE                                                                                                                                       | no  | CGP  |
| PRKAA2   | -0.34626358 | 0.0022  | 0.01033 Panobinostat | HDAC                                            | START->BRD2(mutation)        | REACTOME PI3K CASCADE                                                                                                                                       | no  | CCLE |
| PRKAA2   | -0.32701428 | 0.00345 | 0.01527 PD-0325901   | MEK                                             | START->BRAF(mutation)        | REACTOME PI3K CASCADE                                                                                                                                       | no  | CCLE |
| PRKAA2   | 0.385216186 | 0.00115 | 0.00503 SB590885     | BRAF                                            | START->BRAF(mutation)        | REACTOME PI3K CASCADE                                                                                                                                       | no  | CGP  |
| PRKAA2   | -0.8642544  | 0.00195 | 0.00928 Topotecan    | Topoisomerase I                                 | START->IGLL5(deletion)       | REACTOME PI3K CASCADE                                                                                                                                       | no  | CCLE |
| PRKAA2   | -0.75766084 | 0.0079  | 0.02993 ZD-6474      | Abl, EGFR, Flt3, C-KIT, RET, VEGFR-1, KDR, FLT4 | START->NLGN4X(deletion)      | REACTOME PI3K CASCADE                                                                                                                                       | no  | CCLE |
| PRKAG2   | 0.454877269 | 0.0014  | 0.00587 AZD6244      | MEK1/2                                          | START->BRAF(mutation)        | REACTOME PI3K CASCADE                                                                                                                                       | no  | CGP  |
| PRKAG2   | 0.418280926 | 0.0043  | 0.01366 PLX4720      | BRAF                                            | START->BRAF(mutation)        | REACTOME PI3K CASCADE                                                                                                                                       | no  | CGP  |

|         |             |         |         |                    |                                      |                              |                                                                                                                                                                                                                    |     |      |
|---------|-------------|---------|---------|--------------------|--------------------------------------|------------------------------|--------------------------------------------------------------------------------------------------------------------------------------------------------------------------------------------------------------------|-----|------|
| PRKAG2  | 0.389832896 | 0.0037  | 0.01229 | SB590885           | BRAF                                 | START->BRAF(mutation)        | REACTOME PI3K CASCADE                                                                                                                                                                                              | no  | CGP  |
| PRKAG2  | -0.63221644 | 0.00075 | 0.00391 | TAE684             | ALK                                  | START->HDHD1(deletion)       | REACTOME PI3K CASCADE                                                                                                                                                                                              | no  | CCLE |
| PRKAR2B | -0.92752191 | 0.00155 | 0.00756 | Topotecan          | Topoisomerase I                      | START->NCRNA00226(deletion)  | KEGG APOPTOSIS                                                                                                                                                                                                     | yes | CCLE |
| PRKCB   | 0.310601576 | 0       | 0       | RDEA119            | MEK1/2                               | START->CDKN2A(mutation)      | KEGG WNT SIGNALING PATHWAY,KEGG MAPK SIGNALING PATHWAY                                                                                                                                                             | yes | CGP  |
| PSMA8   | -0.82503759 | 0.0078  | 0.02965 | Topotecan          | Topoisomerase I                      | START->NCRNA00226(deletion)  | REACTOME SIGNALING BY WNT,REACTOME P53 INDEPENDENT G1 S DNA DAMAGE CHECKPOINT,REACTOME P53 DEPENDENT G1 DNA DAMAGE RESPONSE,REACTOME REGULATION OF APOPTOSIS,REACTOME APOPTOSIS                                    | no  | CCLE |
| PSMB10  | 0.480583051 | 0.00045 | 0.00233 | SB590885           | BRAF                                 | START->BRAF(mutation)        | REACTOME G1 S TRANSITION,REACTOME SIGNALING BY WNT,REACTOME P53 INDEPENDENT G1 S DNA DAMAGE CHECKPOINT,REACTOME P53 DEPENDENT G1 DNA DAMAGE RESPONSE,REACTOME REGULATION OF APOPTOSIS,REACTOME APOPTOSIS           | no  | CGP  |
| PSMB9   | 0.601286277 | 0.0098  | 0.02435 | Vorinostat         | HDAC inhibitor Class I, IIa, IIb, IV | START->EWS_FL11(mutation)    | REACTOME G1 S TRANSITION,REACTOME SIGNALING BY WNT,REACTOME P53 INDEPENDENT G1 S DNA DAMAGE CHECKPOINT,REACTOME P53 DEPENDENT G1 DNA DAMAGE RESPONSE,REACTOME REGULATION OF APOPTOSIS,REACTOME APOPTOSIS           | no  | CGP  |
| PTEN    | 0.311020406 | 0.00075 | 0.00356 | MG-132             | Proteasome                           | START->CDKN2A(mutation)      | REACTOME PI3K EVENTS IN ERBB4 SIGNALING,REACTOME PI3K EVENTS IN ERBB2 SIGNALING,BIOCARTA PTEN PATHWAY,REACTOME NEGATIVE REGULATION OF THE PI3K AKT NETWORK,REACTOME PI3K AKT ACTIVATION,KEGG P53 SIGNALING PATHWAY | no  | CGP  |
| PTEN    | 0.418588669 | 0.00415 | 0.01333 | PLX4720            | BRAF                                 | START->BRAF(mutation)        | REACTOME PI3K EVENTS IN ERBB4 SIGNALING,REACTOME PI3K EVENTS IN ERBB2 SIGNALING,BIOCARTA PTEN PATHWAY,REACTOME NEGATIVE REGULATION OF THE PI3K AKT NETWORK,REACTOME PI3K AKT ACTIVATION,KEGG P53 SIGNALING PATHWAY | no  | CGP  |
| PTK2    | 0.822207987 | 0.00425 | 0.01355 | ABT-263            | BCL2, BCL-XL, BCL-W                  | START->NOTCH1(mutation)      | REACTOME APOPTOSIS,BIOCARTA PTEN PATHWAY                                                                                                                                                                           | yes | CGP  |
| PTK2    | -0.30513158 | 0.0084  | 0.03128 | AZD6244            | MEK                                  | START->BRAF(mutation)        | REACTOME APOPTOSIS,BIOCARTA PTEN PATHWAY                                                                                                                                                                           | yes | CCLE |
| PTK2    | -0.39192545 | 0.0023  | 0.01075 | PLX4720            | RAF                                  | START->BRAF(mutation)        | REACTOME APOPTOSIS,BIOCARTA PTEN PATHWAY                                                                                                                                                                           | yes | CCLE |
| PTK2    | -0.3923164  | 0.0035  | 0.01546 | RAF265             | Raf kinase B, KDR                    | START->BRAF(mutation)        | REACTOME APOPTOSIS,BIOCARTA PTEN PATHWAY                                                                                                                                                                           | yes | CCLE |
| PTK2    | -0.6095329  | 0.0015  | 0.00734 | TAE684             | ALK                                  | START->HDHD1(deletion)       | REACTOME APOPTOSIS,BIOCARTA PTEN PATHWAY                                                                                                                                                                           | yes | CCLE |
| PTPN6   | 0.646745509 | 0.00265 | 0.00955 | GDC-0449           | SMO                                  | START->EWS_FL11(mutation)    | KEGG JAK STAT SIGNALING PATHWAY                                                                                                                                                                                    | no  | CGP  |
| PTPN7   | 0.401730276 | 0.0045  | 0.0141  | PLX4720            | BRAF                                 | START->BRAF(mutation)        | KEGG MAPK SIGNALING PATHWAY                                                                                                                                                                                        | no  | CGP  |
| PTPRR   | 0.425960556 | 0.00085 | 0.00395 | AKT_inhibitor_VIII | AKT1/2                               | START->PIK3CA(mutation)      | KEGG MAPK SIGNALING PATHWAY                                                                                                                                                                                        | no  | CGP  |
| PTPRR   | 0.534601834 | 0.00495 | 0.01512 | AZ628              | BRAF                                 | START->BRAF(mutation)        | KEGG MAPK SIGNALING PATHWAY                                                                                                                                                                                        | no  | CGP  |
| RAC2    | 0.325949136 | 0.0004  | 0.0021  | MG-132             | Proteasome                           | START->CDKN2A(mutation)      | KEGG WNT SIGNALING PATHWAY,KEGG MAPK SIGNALING PATHWAY                                                                                                                                                             | no  | CGP  |
| RASGRP1 | 0.306607289 | 0       | 0       | RDEA119            | MEK1/2                               | START->CDKN2A(mutation)      | KEGG MAPK SIGNALING PATHWAY                                                                                                                                                                                        | no  | CGP  |
| RASGRP2 | 0.357754632 | 0.0002  | 0.00114 | MG-132             | Proteasome                           | START->CDKN2A(mutation)      | KEGG MAPK SIGNALING PATHWAY                                                                                                                                                                                        | no  | CGP  |
| RPRM    | 0.515360332 | 0.0073  | 0.0199  | AZ628              | BRAF                                 | START->BRAF(mutation)        | KEGG P53 SIGNALING PATHWAY                                                                                                                                                                                         | no  | CGP  |
| RPS6KA2 | 0.301895892 | 0.00115 | 0.00503 | PF-02341066        | MET, ALK                             | START->CDKN2a(p14)(deletion) | KEGG MAPK SIGNALING PATHWAY,BIOCARTA MAPK PATHWAY                                                                                                                                                                  | no  | CGP  |
| RPS6KA6 | -0.30666078 | 0.00415 | 0.01785 | AZD6244            | MEK                                  | START->BRAF(mutation)        | KEGG MAPK SIGNALING PATHWAY                                                                                                                                                                                        | no  | CCLE |
| RPS6KA6 | -0.35264097 | 0.0012  | 0.006   | PD-0325901         | MEK                                  | START->BRAF(mutation)        | KEGG MAPK SIGNALING PATHWAY                                                                                                                                                                                        | no  | CCLE |
| RPS6KA6 | -0.33450132 | 0.00055 | 0.00293 | PLX4720            | RAF                                  | START->BRAF(mutation)        | KEGG MAPK SIGNALING PATHWAY                                                                                                                                                                                        | no  | CCLE |
| RPS6KA6 | -0.67281714 | 0.00795 | 0.03007 | Topotecan          | Topoisomerase I                      | START->IGLL5(deletion)       | KEGG MAPK SIGNALING PATHWAY                                                                                                                                                                                        | no  | CCLE |

|          |             |         |         |                    |                                       |                              |                                                                            |     |      |
|----------|-------------|---------|---------|--------------------|---------------------------------------|------------------------------|----------------------------------------------------------------------------|-----|------|
| RRAS     | -0.32777222 | 0.003   | 0.01355 | AZD6244            | MEK                                   | START->BRAF(mutation)        | KEGG MAPK SIGNALING PATHWAY                                                | no  | CCLE |
| RRAS     | -0.325521   | 0.003   | 0.01355 | PD-0325901         | MEK                                   | START->BRAF(mutation)        | KEGG MAPK SIGNALING PATHWAY                                                | no  | CCLE |
| RRAS     | 0.406646046 | 0.0032  | 0.01105 | SB590885           | BRAF                                  | START->BRAF(mutation)        | KEGG MAPK SIGNALING PATHWAY                                                | no  | CGP  |
| RRAS     | 0.312162675 | 0.00115 | 0.00503 | Sunitinib          | PDGFRA, PDGFRB, VEGFR(KDR), KIT, FLT3 | START->CDKN2a(p14)(deletion) | KEGG MAPK SIGNALING PATHWAY                                                | no  | CGP  |
| RRAS     | -0.73559357 | 0       | 0       | TAE684             | ALK                                   | START->HDHD1(deletion)       | KEGG MAPK SIGNALING PATHWAY                                                | no  | CCLE |
| RRAS2    | 0.349566807 | 0.00885 | 0.02272 | AKT_inhibitor_VIII | AKT1/2                                | START->PIK3CA(mutation)      | KEGG MAPK SIGNALING PATHWAY                                                | no  | CGP  |
| RRAS2    | -0.45330648 | 0.00005 | 0.00029 | AZD6244            | MEK                                   | START->BRAF(mutation)        | KEGG MAPK SIGNALING PATHWAY                                                | no  | CCLE |
| RRAS2    | -0.69020216 | 0.00135 | 0.00667 | Lapatinib          | EGFR, HER2                            | START->IKZF3(amplication)    | KEGG MAPK SIGNALING PATHWAY                                                | no  | CCLE |
| RRAS2    | 0.405047387 | 0.0025  | 0.00916 | MK-2206            | AKT1/2                                | START->PIK3CA(mutation)      | KEGG MAPK SIGNALING PATHWAY                                                | no  | CGP  |
| RRAS2    | -0.42431037 | 0.0001  | 0.00058 | PD-0325901         | MEK                                   | START->BRAF(mutation)        | KEGG MAPK SIGNALING PATHWAY                                                | no  | CCLE |
| RRAS2    | -0.41768505 | 0.00115 | 0.00578 | PLX4720            | RAF                                   | START->BRAF(mutation)        | KEGG MAPK SIGNALING PATHWAY                                                | no  | CCLE |
| RRAS2    | 0.353903518 | 0.0087  | 0.02243 | SB590885           | BRAF                                  | START->BRAF(mutation)        | KEGG MAPK SIGNALING PATHWAY                                                | no  | CGP  |
| RRAS2    | 0.339003585 | 0.0011  | 0.00486 | Sunitinib          | PDGFRA, PDGFRB, VEGFR(KDR), KIT, FLT3 | START->CDKN2a(p14)(deletion) | KEGG MAPK SIGNALING PATHWAY                                                | no  | CGP  |
| RRAS2    | -0.82370913 | 0       | 0       | TAE684             | ALK                                   | START->HDHD1(deletion)       | KEGG MAPK SIGNALING PATHWAY                                                | no  | CCLE |
| SATB1    | 0.342200383 | 0.00025 | 0.0014  | AZD-0530           | SRC, ABL1                             | START->CDKN2A(mutation)      | REACTOME APOPTOSIS                                                         | no  | CGP  |
| SATB1    | 0.300513231 | 0.00135 | 0.0057  | BMS-536924         | IGF1R                                 | START->CDKN2A(mutation)      | REACTOME APOPTOSIS                                                         | no  | CGP  |
| SATB1    | 0.316302055 | 0.00125 | 0.00537 | Erlotinib          | EGFR                                  | START->CDKN2a(p14)(mutation) | REACTOME APOPTOSIS                                                         | no  | CGP  |
| SATB1    | 0.31001061  | 0.0005  | 0.00255 | Erlotinib          | EGFR                                  | START->CDKN2A(mutation)      | REACTOME APOPTOSIS                                                         | no  | CGP  |
| SERPINB5 | 0.823311889 | 0.0073  | 0.0199  | ABT-263            | BCL2, BCL-XL, BCL-W                   | START->NOTCH1(mutation)      | KEGG P53 SIGNALING PATHWAY                                                 | yes | CGP  |
| SERPINE1 | 0.508915291 | 0.00005 | 0.00032 | AKT_inhibitor_VIII | AKT1/2                                | START->PIK3CA(mutation)      | REACTOME SIGNALING BY TGF BETA RECEPTOR COMPLEX,KEGG P53 SIGNALING PATHWAY | yes | CGP  |
| SFN      | 0.393781028 | 0.00615 | 0.01766 | PLX4720            | BRAF                                  | START->BRAF(mutation)        | KEGG CELL CYCLE,KEGG P53 SIGNALING PATHWAY                                 | no  | CGP  |
| SFN      | -0.43734983 | 0       | 0       | PLX4720            | RAF                                   | START->BRAF(mutation)        | KEGG CELL CYCLE,KEGG P53 SIGNALING PATHWAY                                 | no  | CCLE |
| SFN      | 0.386522537 | 0.00415 | 0.01333 | SB590885           | BRAF                                  | START->BRAF(mutation)        | KEGG CELL CYCLE,KEGG P53 SIGNALING PATHWAY                                 | no  | CGP  |
| SFRP1    | 0.403398266 | 0.0023  | 0.0086  | AKT_inhibitor_VIII | AKT1/2                                | START->PIK3CA(mutation)      | KEGG WNT SIGNALING PATHWAY                                                 | no  | CGP  |
| SFRP1    | -0.47663904 | 0.001   | 0.00508 | Lapatinib          | EGFR, HER2                            | START->ERBB2(amplication)    | KEGG WNT SIGNALING PATHWAY                                                 | no  | CCLE |
| SFRP1    | -0.84909545 | 0.00135 | 0.00667 | Topotecan          | Topoisomerase I                       | START->NCRNA00226(deletion)  | KEGG WNT SIGNALING PATHWAY                                                 | no  | CCLE |
| SFRP4    | -0.86398901 | 0.00865 | 0.03195 | Irinotecan         | Topoisomerase I                       | START->IGLL5(deletion)       | KEGG WNT SIGNALING PATHWAY                                                 | no  | CCLE |
| SMAD1    | 0.655329037 | 0.0093  | 0.02348 | ABT-263            | BCL2, BCL-XL, BCL-W                   | START->NOTCH1(mutation)      | KEGG TGF BETA SIGNALING PATHWAY                                            | no  | CGP  |
| SMAD1    | -0.3123414  | 0.0057  | 0.02314 | AZD6244            | MEK                                   | START->BRAF(mutation)        | KEGG TGF BETA SIGNALING PATHWAY                                            | no  | CCLE |
| SMAD1    | -0.30214294 | 0.00625 | 0.02492 | PD-0325901         | MEK                                   | START->BRAF(mutation)        | KEGG TGF BETA SIGNALING PATHWAY                                            | no  | CCLE |
| SMAD1    | -0.41182663 | 0.00055 | 0.00293 | PLX4720            | RAF                                   | START->BRAF(mutation)        | KEGG TGF BETA SIGNALING PATHWAY                                            | no  | CCLE |
| SMAD1    | -0.33423267 | 0.0051  | 0.02114 | RAF265             | Raf kinase B, KDR                     | START->BRAF(mutation)        | KEGG TGF BETA SIGNALING PATHWAY                                            | no  | CCLE |

|         |             |         |         |                    |                     |                           |                                                                                                                                                                                                                                   |    |      |
|---------|-------------|---------|---------|--------------------|---------------------|---------------------------|-----------------------------------------------------------------------------------------------------------------------------------------------------------------------------------------------------------------------------------|----|------|
| SMAD7   | 0.397282639 | 0.0027  | 0.0097  | AKT_inhibitor_VIII | AKT1/2              | START->PIK3CA(mutation)   | BIOCARTA TGFB PATHWAY,KEGG TGF BETA SIGNALING PATHWAY,PID TGFBPATHWAY,REACTOME DOWNREGULATION OF TGF BETA RECEPTOR SIGNALING,REACTOME TGF BETA RECEPTOR SIGNALING ACTIVATES SMADS,REACTOME SIGNALING BY TGF BETA RECEPTOR COMPLEX | no | CGP  |
| SMAD9   | -0.79253586 | 0.0055  | 0.02248 | Topotecan          | Topoisomerase I     | START->IGLL5(deletion)    | KEGG TGF BETA SIGNALING PATHWAY                                                                                                                                                                                                   | no | CCLE |
| SOCS1   | -0.30211656 | 0.00415 | 0.01785 | AZD6244            | MEK                 | START->BRAF(mutation)     | KEGG JAK STAT SIGNALING PATHWAY                                                                                                                                                                                                   | no | CCLE |
| SOCS1   | -0.34166386 | 0.00125 | 0.00623 | PD-0325901         | MEK                 | START->BRAF(mutation)     | KEGG JAK STAT SIGNALING PATHWAY                                                                                                                                                                                                   | no | CCLE |
| SOCS2   | 0.487417524 | 0.00835 | 0.02179 | AZ628              | BRAF                | START->BRAF(mutation)     | KEGG JAK STAT SIGNALING PATHWAY                                                                                                                                                                                                   | no | CGP  |
| SOX17   | -0.33050948 | 0.0013  | 0.00645 | AZD6244            | MEK                 | START->BRAF(mutation)     | KEGG WNT SIGNALING PATHWAY                                                                                                                                                                                                        | no | CCLE |
| SOX17   | -0.33249121 | 0.00175 | 0.00843 | PD-0325901         | MEK                 | START->BRAF(mutation)     | KEGG WNT SIGNALING PATHWAY                                                                                                                                                                                                        | no | CCLE |
| SOX17   | 0.762218707 | 0.00545 | 0.0162  | ZM-447439          | AURKB               | START->NOTCH1(mutation)   | KEGG WNT SIGNALING PATHWAY                                                                                                                                                                                                        | no | CGP  |
| SPRED1  | -0.32011568 | 0.0072  | 0.02789 | Panobinostat       | HDAC                | START->BRD2(mutation)     | KEGG JAK STAT SIGNALING PATHWAY                                                                                                                                                                                                   | no | CCLE |
| SPRY1   | 0.931688546 | 0.002   | 0.00772 | Lapatinib          | EGFR, ERBB2         | START->SMAD4(mutation)    | KEGG JAK STAT SIGNALING PATHWAY                                                                                                                                                                                                   | no | CGP  |
| SPRY2   | 0.755872577 | 0.0045  | 0.0141  | ABT-263            | BCL2, BCL-XL, BCL-W | START->NOTCH1(mutation)   | KEGG JAK STAT SIGNALING PATHWAY                                                                                                                                                                                                   | no | CGP  |
| SPRY2   | 0.438737105 | 0.00105 | 0.00468 | AKT_inhibitor_VIII | AKT1/2              | START->PIK3CA(mutation)   | KEGG JAK STAT SIGNALING PATHWAY                                                                                                                                                                                                   | no | CGP  |
| SPRY2   | 0.603041602 | 0.00745 | 0.02016 | AZD-2281           | PARP1/2             | START->EWS_FLI1(mutation) | KEGG JAK STAT SIGNALING PATHWAY                                                                                                                                                                                                   | no | CGP  |
| SPRY4   | 0.351885149 | 0.00765 | 0.02053 | AKT_inhibitor_VIII | AKT1/2              | START->PIK3CA(mutation)   | KEGG JAK STAT SIGNALING PATHWAY                                                                                                                                                                                                   | no | CGP  |
| SPRY4   | -0.41696317 | 0.0044  | 0.01874 | Panobinostat       | HDAC                | START->MAP4K4(mutation)   | KEGG JAK STAT SIGNALING PATHWAY                                                                                                                                                                                                   | no | CCLE |
| SPRY4   | -0.30249674 | 0.00845 | 0.03141 | Panobinostat       | HDAC                | START->BRD2(mutation)     | KEGG JAK STAT SIGNALING PATHWAY                                                                                                                                                                                                   | no | CCLE |
| ST3GAL6 | 0.481488653 | 0.00025 | 0.0014  | AKT_inhibitor_VIII | AKT1/2              | START->PIK3CA(mutation)   | REACTOME SIGNALING BY NOTCH                                                                                                                                                                                                       | no | CGP  |
| ST3GAL6 | -0.60896374 | 0.00155 | 0.00756 | Lapatinib          | EGFR, HER2          | START->ERBB2(amplication) | REACTOME SIGNALING BY NOTCH                                                                                                                                                                                                       | no | CCLE |
| ST3GAL6 | -0.60230807 | 0.0003  | 0.00166 | Lapatinib          | EGFR, HER2          | START->ZPP2(amplication)  | REACTOME SIGNALING BY NOTCH                                                                                                                                                                                                       | no | CCLE |
| ST3GAL6 | -0.59006932 | 0.0039  | 0.01696 | Lapatinib          | EGFR, HER2          | START->IKZF3(amplication) | REACTOME SIGNALING BY NOTCH                                                                                                                                                                                                       | no | CCLE |
| STAT4   | 0.421994595 | 0.00165 | 0.00662 | AKT_inhibitor_VIII | AKT1/2              | START->PIK3CA(mutation)   | KEGG JAK STAT SIGNALING PATHWAY                                                                                                                                                                                                   | no | CGP  |
| STEAP3  | 0.384841932 | 0.00705 | 0.01943 | AZD6244            | MEK1/2              | START->BRAF(mutation)     | KEGG P53 SIGNALING PATHWAY                                                                                                                                                                                                        | no | CGP  |
| STEAP3  | 0.437684032 | 0.0059  | 0.01714 | CI-1040            | MEK1/2              | START->BRAF(mutation)     | KEGG P53 SIGNALING PATHWAY                                                                                                                                                                                                        | no | CGP  |
| STEAP3  | 0.889796646 | 0.00775 | 0.02071 | Lapatinib          | EGFR, ERBB2         | START->SMAD4(mutation)    | KEGG P53 SIGNALING PATHWAY                                                                                                                                                                                                        | no | CGP  |
| TBL1X   | 0.410952364 | 0.00335 | 0.01144 | AZD6244            | MEK1/2              | START->BRAF(mutation)     | KEGG WNT SIGNALING PATHWAY,REACTOME SIGNALING BY NOTCH                                                                                                                                                                            | no | CGP  |
| TBL1X   | 0.480186577 | 0.001   | 0.0045  | PLX4720            | BRAF                | START->BRAF(mutation)     | KEGG WNT SIGNALING PATHWAY,REACTOME SIGNALING BY NOTCH                                                                                                                                                                            | no | CGP  |
| TBL1X   | -0.33811378 | 0.0033  | 0.0147  | PLX4720            | RAF                 | START->BRAF(mutation)     | KEGG WNT SIGNALING PATHWAY,REACTOME SIGNALING BY NOTCH                                                                                                                                                                            | no | CCLE |
| TBL1X   | 0.43285209  | 0.00115 | 0.00503 | RDEA119            | MEK1/2              | START->BRAF(mutation)     | KEGG WNT SIGNALING PATHWAY,REACTOME SIGNALING BY NOTCH                                                                                                                                                                            | no | CGP  |
| TBL1X   | 0.486496954 | 0.0004  | 0.0021  | SB590885           | BRAF                | START->BRAF(mutation)     | KEGG WNT SIGNALING PATHWAY,REACTOME SIGNALING BY NOTCH                                                                                                                                                                            | no | CGP  |
| TCF7L1  | -0.48314226 | 0.00115 | 0.00578 | Panobinostat       | HDAC                | START->MAP4K4(mutation)   | KEGG WNT SIGNALING PATHWAY                                                                                                                                                                                                        | no | CCLE |
| TCF7L1  | -0.4368666  | 0.0051  | 0.02114 | TAE684             | ALK                 | START->HDHD1(deletion)    | KEGG WNT SIGNALING PATHWAY                                                                                                                                                                                                        | no | CCLE |
| TCF7L2  | 0.392543938 | 0.0045  | 0.0141  | MK-2206            | AKT1/2              | START->PIK3CA(mutation)   | KEGG WNT SIGNALING PATHWAY                                                                                                                                                                                                        | no | CGP  |
| TCF7L2  | -0.48246792 | 0.00925 | 0.03356 | TAE684             | ALK                 | START->HDHD1(deletion)    | KEGG WNT SIGNALING PATHWAY                                                                                                                                                                                                        | no | CCLE |

|        |             |         |         |                    |                                       |                              |                                                                                                                                                                                                                                                                                                                                                |     |      |
|--------|-------------|---------|---------|--------------------|---------------------------------------|------------------------------|------------------------------------------------------------------------------------------------------------------------------------------------------------------------------------------------------------------------------------------------------------------------------------------------------------------------------------------------|-----|------|
| TGFB2  | 0.668156057 | 0.0048  | 0.01479 | AZD-2281           | PARP1/2                               | START->EWS_FLI1(mutation)    | BIOCARTA TGFB PATHWAY,KEGG TGF BETA SIGNALING PATHWAY,PID TGFBPATHWAY,KEGG MAPK SIGNALING PATHWAY,BIOCARTA MAPK PATHWAY,KEGG CELL CYCLE                                                                                                                                                                                                        | no  | CGP  |
| TGFB2  | -0.32357706 | 0.00345 | 0.01527 | PD-0325901         | MEK                                   | START->BRAF(mutation)        | BIOCARTA TGFB PATHWAY,KEGG TGF BETA SIGNALING PATHWAY,PID TGFBPATHWAY,KEGG MAPK SIGNALING PATHWAY,BIOCARTA MAPK PATHWAY,KEGG CELL CYCLE                                                                                                                                                                                                        | no  | CCLE |
| TGFBR2 | 0.448672108 | 0.0006  | 0.00297 | AKT_inhibitor_VIII | AKT1/2                                | START->PIK3CA(mutation)      | BIOCARTA TGFB PATHWAY,KEGG TGF BETA SIGNALING PATHWAY,PID TGFBPATHWAY,REACTOME DOWNREGULATION OF TGF BETA RECEPTOR SIGNALING,REACTOME TGF BETA RECEPTOR SIGNALING IN EMT EPITHELIAL TO MESENCHYMAL TRANSITION,REACTOME TGF BETA RECEPTOR SIGNALING ACTIVATES SMADS,REACTOME SIGNALING BY TGF BETA RECEPTOR COMPLEX,KEGG MAPK SIGNALING PATHWAY | yes | CGP  |
| TGFBR2 | 0.883378516 | 0.00995 | 0.02461 | Lapatinib          | EGFR, ERBB2                           | START->SMAD4(mutation)       | BIOCARTA TGFB PATHWAY,KEGG TGF BETA SIGNALING PATHWAY,PID TGFBPATHWAY,REACTOME DOWNREGULATION OF TGF BETA RECEPTOR SIGNALING,REACTOME TGF BETA RECEPTOR SIGNALING IN EMT EPITHELIAL TO MESENCHYMAL TRANSITION,REACTOME TGF BETA RECEPTOR SIGNALING ACTIVATES SMADS,REACTOME SIGNALING BY TGF BETA RECEPTOR COMPLEX,KEGG MAPK SIGNALING PATHWAY | yes | CGP  |
| TGFBR2 | 0.379961163 | 0.00555 | 0.01641 | MK-2206            | AKT1/2                                | START->PIK3CA(mutation)      | BIOCARTA TGFB PATHWAY,KEGG TGF BETA SIGNALING PATHWAY,PID TGFBPATHWAY,REACTOME DOWNREGULATION OF TGF BETA RECEPTOR SIGNALING,REACTOME TGF BETA RECEPTOR SIGNALING IN EMT EPITHELIAL TO MESENCHYMAL TRANSITION,REACTOME TGF BETA RECEPTOR SIGNALING ACTIVATES SMADS,REACTOME SIGNALING BY TGF BETA RECEPTOR COMPLEX,KEGG MAPK SIGNALING PATHWAY | yes | CGP  |
| TGFBR3 | 0.346147062 | 0.00905 | 0.02306 | AKT_inhibitor_VIII | AKT1/2                                | START->PIK3CA(mutation)      | PID TGFBPATHWAY                                                                                                                                                                                                                                                                                                                                | no  | CGP  |
| TGIF1  | 0.87433197  | 0.00045 | 0.00233 | ABT-263            | BCL2, BCL-XL, BCL-W                   | START->NOTCH1(mutation)      | REACTOME SIGNALING BY TGF BETA RECEPTOR COMPLEX                                                                                                                                                                                                                                                                                                | no  | CGP  |
| TGIF1  | 0.669562495 | 0.00315 | 0.01091 | AZD-2281           | PARP1/2                               | START->EWS_FLI1(mutation)    | REACTOME SIGNALING BY TGF BETA RECEPTOR COMPLEX                                                                                                                                                                                                                                                                                                | no  | CGP  |
| TGIF1  | 0.646963134 | 0.0039  | 0.01278 | GDC-0449           | SMO                                   | START->EWS_FLI1(mutation)    | REACTOME SIGNALING BY TGF BETA RECEPTOR COMPLEX                                                                                                                                                                                                                                                                                                | no  | CGP  |
| TGIF1  | 0.470795681 | 0.0007  | 0.00338 | MK-2206            | AKT1/2                                | START->PIK3CA(mutation)      | REACTOME SIGNALING BY TGF BETA RECEPTOR COMPLEX                                                                                                                                                                                                                                                                                                | no  | CGP  |
| TGIF1  | 0.626858696 | 0.00555 | 0.01641 | Vorinostat         | HDAC inhibitor Class I, IIa, IIb, IV  | START->EWS_FLI1(mutation)    | REACTOME SIGNALING BY TGF BETA RECEPTOR COMPLEX                                                                                                                                                                                                                                                                                                | no  | CGP  |
| THBS2  | 0.37281938  | 0.00405 | 0.0131  | AKT_inhibitor_VIII | AKT1/2                                | START->PIK3CA(mutation)      | KEGG TGF BETA SIGNALING PATHWAY                                                                                                                                                                                                                                                                                                                | no  | CGP  |
| THBS4  | -0.60052019 | 0.00855 | 0.03167 | Lapatinib          | EGFR, HER2                            | START->ZBP2(amplication)     | KEGG TGF BETA SIGNALING PATHWAY                                                                                                                                                                                                                                                                                                                | no  | CCLE |
| THBS4  | 0.646046702 | 0.0009  | 0.00413 | ZM-447439          | AURKB                                 | START->NOTCH1(mutation)      | KEGG TGF BETA SIGNALING PATHWAY                                                                                                                                                                                                                                                                                                                | no  | CGP  |
| TIMP3  | -0.59428373 | 0.00955 | 0.03437 | Lapatinib          | EGFR, HER2                            | START->IKZF3(amplication)    | BIOCARTA P53 PATHWAY                                                                                                                                                                                                                                                                                                                           | no  | CCLE |
| TIMP3  | -0.35512354 | 0.0029  | 0.01316 | Panobinostat       | HDAC                                  | START->BRD2(mutation)        | BIOCARTA P53 PATHWAY                                                                                                                                                                                                                                                                                                                           | no  | CCLE |
| TJP1   | 0.362108941 | 0.0009  | 0.00413 | PF-02341066        | MET, ALK                              | START->CDKN2a(p14)(deletion) | REACTOME APOPTOSIS                                                                                                                                                                                                                                                                                                                             | no  | CGP  |
| TJP1   | -0.35271708 | 0.0035  | 0.01546 | PLX4720            | RAF                                   | START->BRAF(mutation)        | REACTOME APOPTOSIS                                                                                                                                                                                                                                                                                                                             | no  | CCLE |
| TJP1   | 0.30497979  | 0.004   | 0.013   | Sunitinib          | PDGFRA, PDGFRB, VEGFR(KDR), KIT, FLT3 | START->CDKN2a(p14)(deletion) | REACTOME APOPTOSIS                                                                                                                                                                                                                                                                                                                             | no  | CGP  |
| TJP1   | -0.55365523 | 0.0038  | 0.01659 | TAE684             | ALK                                   | START->HDHD1(deletion)       | REACTOME APOPTOSIS                                                                                                                                                                                                                                                                                                                             | no  | CCLE |
| TJP2   | 0.646492274 | 0.0002  | 0.00114 | AZ628              | BRAF                                  | START->BRAF(mutation)        | REACTOME APOPTOSIS                                                                                                                                                                                                                                                                                                                             | no  | CGP  |
| TJP2   | 0.369423916 | 0.0001  | 0.00061 | AZ628              | BRAF                                  | START->CDKN2A(mutation)      | REACTOME APOPTOSIS                                                                                                                                                                                                                                                                                                                             | no  | CGP  |
| TJP2   | 0.414205496 | 0.0047  | 0.01457 | PLX4720            | BRAF                                  | START->BRAF(mutation)        | REACTOME APOPTOSIS                                                                                                                                                                                                                                                                                                                             | no  | CGP  |



|         |             |         |                            |                                       |                              |                                                                                      |     |      |
|---------|-------------|---------|----------------------------|---------------------------------------|------------------------------|--------------------------------------------------------------------------------------|-----|------|
| TJP2    | 0.501038646 | 0.0001  | 0.00061 SB590885           | BRAF                                  | START->BRAF(mutation)        | REACTOME APOPTOSIS                                                                   | no  | CGP  |
| TJP2    | 0.721555236 | 0.00805 | 0.02127 ZM-447439          | AURKB                                 | START->NOTCH1(mutation)      | REACTOME APOPTOSIS                                                                   | no  | CGP  |
| TLE2    | -0.45159588 | 0       | 0 PLX4720                  | RAF                                   | START->BRAF(mutation)        | REACTOME SIGNALING BY NOTCH                                                          | no  | CCLE |
| TLE4    | 0.301897746 | 0.0011  | 0.00486 Erlotinib          | EGFR                                  | START->CDKN2A(mutation)      | REACTOME SIGNALING BY NOTCH                                                          | no  | CGP  |
| TNFSF10 | 0.444338831 | 0.00015 | 0.00089 SB590885           | BRAF                                  | START->BRAF(mutation)        | REACTOME APOPTOSIS,KEGG APOPTOSIS                                                    | no  | CGP  |
| TP53I3  | -0.40967343 | 0.00585 | 0.02363 Panobinostat       | HDAC                                  | START->MAP4K4(mutation)      | KEGG P53 SIGNALING PATHWAY                                                           | no  | CCLE |
| UNC5B   | -0.30338764 | 0.00565 | 0.02297 PD-0325901         | MEK                                   | START->BRAF(mutation)        | REACTOME REGULATION OF APOPTOSIS,REACTOME APOPTOSIS                                  | no  | CCLE |
| UNC5B   | -0.38008983 | 0.00015 | 0.00085 PLX4720            | RAF                                   | START->BRAF(mutation)        | REACTOME REGULATION OF APOPTOSIS,REACTOME APOPTOSIS                                  | no  | CCLE |
| WNT5B   | 0.616758761 | 0.00665 | 0.01865 ZM-447439          | AURKB                                 | START->NOTCH1(mutation)      | KEGG WNT SIGNALING PATHWAY,KEGG HEDGEHOG SIGNALING PATHWAY                           | no  | CGP  |
| WNT7A   | -0.60934552 | 0.00165 | 0.008 Lapatinib            | EGFR, HER2                            | START->ZBP2(amplication)     | KEGG WNT SIGNALING PATHWAY,KEGG HEDGEHOG SIGNALING PATHWAY,PID WNT SIGNALING PATHWAY | no  | CCLE |
| WWTR1   | 0.332267977 | 0       | 0 PD-0332991               | CDK4/6                                | START->CDKN2a(p14)(mutation) | REACTOME SIGNALING BY TGF BETA RECEPTOR COMPLEX                                      | no  | CGP  |
| WWTR1   | 0.322153085 | 0.00095 | 0.00432 Sunitinib          | PDGFRA, PDGFRB, VEGFR(KDR), KIT, FLT3 | START->CDKN2a(p14)(deletion) | REACTOME SIGNALING BY TGF BETA RECEPTOR COMPLEX                                      | no  | CGP  |
| WWTR1   | -0.62747544 | 0.00015 | 0.00085 TAE684             | ALK                                   | START->HDHD1(deletion)       | REACTOME SIGNALING BY TGF BETA RECEPTOR COMPLEX                                      | no  | CCLE |
| YAP1    | -0.34911214 | 0.00435 | 0.01857 PLX4720            | RAF                                   | START->BRAF(mutation)        | PID TGFBPATHWAY                                                                      | no  | CCLE |
| YAP1    | -0.38476715 | 0.00235 | 0.01096 RAF265             | Raf kinase B, KDR                     | START->BRAF(mutation)        | PID TGFBPATHWAY                                                                      | no  | CCLE |
| YAP1    | -0.54628922 | 0.0069  | 0.02699 TAE684             | ALK                                   | START->HDHD1(deletion)       | PID TGFBPATHWAY                                                                      | no  | CCLE |
| YES1    | 0.828247767 | 0.0037  | 0.01229 ABT-263            | BCL2, BCL-XL, BCL-W                   | START->NOTCH1(mutation)      | PID WNT NONCANONICAL PATHWAY                                                         | yes | CGP  |
| ZIC2    | -0.75716928 | 0.00215 | 0.01012 Lapatinib          | EGFR, HER2                            | START->ZBP2(amplication)     | KEGG HEDGEHOG SIGNALING PATHWAY                                                      | no  | CCLE |
| ZMAT3   | 0.592777574 | 0.00005 | 0.00032 AKT_inhibitor_VIII | AKT1/2                                | START->PIK3CA(mutation)      | KEGG P53 SIGNALING PATHWAY                                                           | no  | CGP  |
